# Supplementary material for: Characterization of Cucurbit Aphid-Borne Yellows Virus (CABYV) from Passion Fruit in Brazil: Evidence of a Complex of Species within CABYV Isolates
Source: MDPI journal article supplement (doi:10.3390/v15020410), 2023-02-01
Supplement: s1 [file s1]

**Table S1.** Primers used in this study.

| Target          | Primer name    | Sequence 5'- 3'                          | Gene (bp)             | Reference  |
|-----------------|----------------|------------------------------------------|-----------------------|------------|
| CABYV           | Modified-CE-9F | ATGAATACGGTCGCGGCTAGAAATC                | CP/MP<br>600          | This study |
|                 | CE-10R         | CTATTTTCGGTTCTGGACCTGGC                  |                       | [32]       |
| CABMV           | CABMVLNJP2492F | GGTTCGTGATGTTTGGTGCC                     | HC-<br>Pro/p3<br>~900 | [13]       |
|                 | CABMVLNJP3373R | CAAAAAGCACGCACTCACAAATC                  |                       | [13]       |
| rbcL            | SI_For         | ATGTCACCACAAACAGAGACTAAAGC               | rbcL<br>~550          | [35]       |
|                 | SI_Rev         | GTAATAATCAAGTCCACCRGC                    |                       | [35]       |
| matK            | KIM 3F         | CGTACAGTACTTTTGTGTTTACGAG                | matK<br>~850          | [35]       |
|                 | KIM 1R         | ACCCAGTCCATCTGGAAATCTTGGTTC              |                       | [35]       |
| 5'Race<br>GSP 1 | AAP            | GGCCACGCGTCGACTAGTACGGGIIIGG<br>IIGGGIIG | 5' end<br>~700        | [39]       |
|                 | CABYVRACE581R  | AAAGCGAGGCGAGTGTAAGC                     |                       | This study |
| 5'Race<br>GSP 2 | AUAP           | GGCCACGCGTCGACTAGTAC                     | 5' end<br>~400        | [39]       |
|                 | CABYVRACE300R  | GGCGGGCAGTCGTAAATCA                      |                       | This study |
| 3'Race<br>GSP 1 | M10            | AAGCAGTGTTATCAACGCAGA                    | 3' end<br>~700        | [39]       |
|                 | CABYVRACE5063F | GCGTCTACAAGCTCTCGTCTC                    |                       | This study |
| 3'Race<br>GSP 2 | M10            | AAGCAGTGTTATCAACGCAGA                    | 3' end<br>~350        | [39]       |
|                 | CABYVRACE5365F | CGCACAGTCAGAAAAACTCGC                    |                       | This study |
| 3'Race          | M10PacIT50VN   | AAGCAGTGTTATCAACGCAGATTAATT<br>AAT50VN   | cDNA                  | [39]       |
| Amplicon1       | CABYV5F        | ACAAAAGATACGAGCGGGTGATG                  | ~1100                 | This study |
|                 | CABYV1186R     | TTGCTTAACACAGATGCATGAGTTT                |                       | This study |
| Amplicon2       | CABYV377F      | GATACAACGAAACCAGACAAACCTT                | ~3700                 | This study |
|                 | CE-10R         | CTATTTTCGGTTCTGGACCTGGC                  |                       | [32]       |
| Amplicon3       | Modified-CE-9F | ATGAATACGGTCGCGGCTAGAAATC                | ~2100                 | This study |
|                 | CABYV3R        | ACACCGAAACGCCAGGGGG                      |                       | This study |

GSP: Gene-Specific Primer, AAP: Abridged Anchor Primer, AUAP: Abridged Universal.

**Table S2.** Number of passion fruit plants positive for CABYV and CABMV.

| Sampling location            |                        | Nº of positive plants |               |
|------------------------------|------------------------|-----------------------|---------------|
| Plant species                | CABYV                  | CABMV                 | 1 CABYV+CABMV |
| Marcionílio de Souza         |                        |                       |               |
| <i>Passiflora edulis</i>     | 0/6 (0.0) <sup>2</sup> | 5/6 (83.3%)           | 0/6 (0.0)     |
| Seabra                       |                        |                       |               |
| <i>Passiflora edulis</i>     | 5/8 (62.5%)            | 7/8 (87.5%)           | 5/8 (62.5%)   |
| Brumado                      |                        |                       |               |
| <i>Passiflora edulis</i>     | 0/2 (0.0)              | 1/2 (50%)             | 0/2 (0.0)     |
| Morro do Chapéu              |                        |                       |               |
| <i>Passiflora edulis</i>     | 1/2 (50%)              | 2/2 (100%)            | 1/2 (50%)     |
| Dom Basílio                  |                        |                       |               |
| <i>Passiflora edulis</i>     | 3/11 (27.2%)           | 8/11 (72.7%)          | 3/11 (27.2%)  |
| Lençóis                      |                        |                       |               |
| <i>Passiflora cincinnata</i> | 01/03                  | 02/03                 | 01/03         |
| <i>Passiflora alata</i>      | 02/03                  | 03/03                 | 02/03         |
| <i>Passiflora edulis</i>     | 8/15                   | 10/15                 | 05/15         |
| Total                        | 11/21 (52.3%)          | 15/21 (71.4%)         | 8/21 (38%)    |
| Jussiapé                     |                        |                       |               |
| <i>Passiflora edulis</i>     | 1/9 (11.1%)            | 9/9 (100%)            | 1/9 (11.1%)   |

<sup>1</sup> Co -infection.<sup>2</sup> Percentage of infected plants is in parenthesis

**Table S3.** List of passion fruit plants evaluated in this study, symptoms observed, and virus identified.

| City                 | Code | Species                      | Symptoms         | Virus        |
|----------------------|------|------------------------------|------------------|--------------|
| Marcionílio de Souza | 500  | <i>Passiflora edulis</i>     | CR, B, M         | CABMV        |
|                      | 501  | <i>Passiflora edulis</i>     | M                | CABMV        |
|                      | 502  | <i>Passiflora edulis</i>     | M                | CABMV        |
|                      | 503  | <i>Passiflora edulis</i>     | M                | CABMV        |
|                      | 504  | <i>Passiflora edulis</i>     | M, YS, B, CR, LD | Not detected |
|                      | 505  | <i>Passiflora edulis</i>     | M, YS, LD        | CABMV        |
| Seabra               | 557  | <i>Passiflora edulis</i>     | M, C, LD         | CABYV, CABMV |
|                      | 558  | <i>Passiflora edulis</i>     | M, C, LD         | CABYV, CABMV |
|                      | 559  | <i>Passiflora edulis</i>     | M, C, LD         | CABYV, CABMV |
|                      | 560  | <i>Passiflora edulis</i>     | M, C, LD         | CABYV, CABMV |
|                      | 561  | <i>Passiflora edulis</i>     | M, C, LD         | CABMV        |
|                      | 562  | <i>Passiflora edulis</i>     | M, C, LD         | Not detected |
|                      | 563  | <i>Passiflora edulis</i>     | M, C, LD         | CABMV        |
|                      | 564  | <i>Passiflora edulis</i>     | M, C, LD         | CABYV, CABMV |
| Brumado              | 629  | <i>Passiflora edulis</i>     | M, B, LD         | CABMV        |
|                      | 630  | <i>Passiflora edulis</i>     | LD               | Not detected |
| Morro do Chapéu      | 798  | <i>Passiflora edulis</i>     | M, B             | CABMV        |
|                      | 799  | <i>Passiflora edulis</i>     | M                | CABYV, CABMV |
| Dom Basílio          | 594  | <i>Passiflora edulis</i>     | Y, LD            | Not detected |
|                      | 595  | <i>Passiflora edulis</i>     | M                | Not detected |
|                      | 596  | <i>Passiflora edulis</i>     | M, VB            | CABMV        |
|                      | 597  | <i>Passiflora edulis</i>     | M                | CABYV, CABMV |
|                      | 598  | <i>Passiflora edulis</i>     | M                | CABMV        |
|                      | 599  | <i>Passiflora edulis</i>     | IS               | Not detected |
|                      | 600  | <i>Passiflora edulis</i>     | LD, IS           | CABMV        |
|                      | 601  | <i>Passiflora edulis</i>     | LD, M, Y         | CABMV        |
|                      | 602  | <i>Passiflora edulis</i>     | IS, M            | CABYV, CABMV |
|                      | 603  | <i>Passiflora edulis</i>     | YD, LD           | CABMV        |
|                      | 611  | <i>Passiflora edulis</i>     | Y, LD, M         | CABYV, CABMV |
| Lençóis              | 523  | <i>Passiflora cincinnata</i> | M, LD            | Not detected |
|                      | 524  | <i>Passiflora cincinnata</i> | M                | CABMV        |
|                      | 525  | <i>Passiflora cincinnata</i> | M                | CABYV, CABMV |
|                      | 716  | <i>Passiflora edulis</i>     | VB               | CABYV        |
|                      | 721  | <i>Passiflora edulis</i>     | GS, M, B         | CABYV, CABMV |
|                      | 723  | <i>Passiflora edulis</i>     | B, LD, M         | CABMV        |
|                      | 724  | <i>Passiflora edulis</i>     | B, LD, M         | CABYV, CABMV |

|          |     |                          |              |              |
|----------|-----|--------------------------|--------------|--------------|
|          | 725 | <i>Passiflora edulis</i> | B, LD, M     | CABYV, CABMV |
|          | 726 | <i>Passiflora edulis</i> | B, LD, M     | CABYV, CABMV |
|          | 727 | <i>Passiflora edulis</i> | M, VB        | Not detected |
|          | 728 | <i>Passiflora edulis</i> | B, LD, M     | Not detected |
|          | 729 | <i>Passiflora edulis</i> | B, LD, M     | CABYV, CABMV |
|          | 730 | <i>Passiflora edulis</i> | B, LD, M     | CABMV        |
|          | 731 | <i>Passiflora alata</i>  | B, M         | CABMV        |
|          | 732 | <i>Passiflora edulis</i> | B, LD, M     | CABYV        |
|          | 733 | <i>Passiflora alata</i>  | B, LD, M     | CABYV, CABMV |
|          | 734 | <i>Passiflora edulis</i> | B, LP        | CABMV        |
|          | 736 | <i>Passiflora edulis</i> | B, LD        | CABMV        |
|          | 737 | <i>Passiflora edulis</i> | M, B, YS     | CABMV        |
|          | 738 | <i>Passiflora alata</i>  | M, B, VB     | CABYV, CABMV |
|          | 739 | <i>Passiflora edulis</i> | B, LD, M     | CABYV        |
| Jussiape | 576 | <i>Passiflora edulis</i> | VB, B, Y     | CABMV        |
|          | 577 | <i>Passiflora edulis</i> | B, LD, M, YS | CABMV        |
|          | 578 | <i>Passiflora edulis</i> | B, LD, FD    | CABMV        |
|          | 579 | <i>Passiflora edulis</i> | B, LD, VW    | CABMV        |
|          | 580 | <i>Passiflora edulis</i> | M, VW        | CABYV, CABMV |
|          | 581 | <i>Passiflora edulis</i> | M, LD, Y     | CABMV        |
|          | 582 | <i>Passiflora edulis</i> | M, LD, Y     | CABMV        |
|          | 583 | <i>Passiflora edulis</i> | B, LD, M     | CABMV        |
|          | 584 | <i>Passiflora edulis</i> | M, N         | CABMV        |

Abbreviation of symptoms: Crinkled (CR), mosaic (M), leaf deformation (LD), fruit deformation (FD), Blistering (B), yellow spot (YS), chlorosis (C), yellowing (Y), insect damage (ID), vein banding (VB), green spot (GS), vein whitening (VW), leaf purplish (LP).

**Table S4.** List of green manure or spontaneous plants positive for CABYV and CABMV, and symptoms observed.

| Code | Family/ Genus                 | Species                  | Symptoms | Virus        |
|------|-------------------------------|--------------------------|----------|--------------|
| 540  | Fabaceae/ <i>Macroptilium</i> | <i>Macroptilium</i> spp. | M        | CABYV        |
| 541  | Cucurbitaceae/ <i>Cucumis</i> | <i>Cucumis</i> spp.      | Y        | CABYV        |
| 543  | Fabaceae/ <i>Macroptilium</i> | <i>Macroptilium</i> spp. | VB       | CABYV        |
| 717  | Fabaceae/ <i>Macroptilium</i> | <i>Macroptilium</i> spp. | UR       | CABYV, CABMV |
| 757  | Fabaceae/ <i>Stylosanthes</i> | <i>Stylosanthes</i> spp. | YS       | CABYV        |
| 760  | Malvaceae/ <i>Sida</i>        | <i>Sida</i> spp.         | Y        | CABYV, CABMV |
| 761  | Bignoniaceae/ <i>Bignonia</i> | <i>Bignonia</i> spp.     | AS       | CABYV, CABMV |

Symptoms: mosaic (M), yellow spot (YS), chlorosis (C), yellowing (Y), vein banding (VB), asymptomatic (AS), and unregistered (UR).
