# Supplementary material for: Characterization of Cucurbit Aphid-Borne Yellows Virus (CABYV) from Passion Fruit in Brazil: Evidence of a Complex of Species within CABYV Isolates
Source: Viruses. 2023 Feb 1;15(2):410. doi: 10.3390/v15020410 (PMC9965994; doi:10.3390/v15020410)
Supplement: Supplementary file 1 [file viruses-15-00410-s001.zip › Vidal et al-Supplem.TableS5.xlsx]

## Sheet: Sheet1
Table S5. Pairwise nucleotide (nt) and aminoacid (aa) sequence percentage identities generated with SDT for the complete genome and proteins P0 to P5 and P3a of CABYV-PF and other CABYV sequences from GenBank
Complete genome (nt)
X76931_France	100.0
MT027103_France	96.4	100.0
MZ202344_France	98.9	95.9	100.0
OP909804 (CABYV-PF-558) Brazil	93.7	94.1	93.2	100.0
OP909805 (CABYV-PF-564) Brazil	94.0	94.1	93.4	96.6	100.0
OP909806 (CABYV-PF-799) Brazil	92.9	93.0	92.4	94.8	94.4	100.0
OP909807 (CABYV-PF-724-1) Brazil	93.7	94.1	93.2	98.1	96.6	94.5	100.0
OP909808 (CABYV-PF-724-2) Brazil	93.8	94.3	93.3	98.6	96.3	94.6	99.1	100.0
OP909809 (CABYV-PF-724-3) Brazil	93.7	94.2	93.2	98.2	96.6	94.5	99.7	99.3	100.0
OP909810 (CABYV-PF-726-1) Brazil	94.0	94.1	93.5	97.5	96.7	94.8	97.2	97.6	97.4	100.0
OP909811 (CABYV-PF-726-2) Brazil	93.9	94.0	93.4	97.0	97.2	94.8	97.4	97.2	97.5	99.4	100.0
OP909812 (CABYV-PF-729) Brazil	93.6	94.0	93.1	99.0	96.5	94.6	97.9	98.4	98.1	97.6	97.1	100.0
JF939814_Spain	95.3	96.8	94.8	93.7	94.0	92.8	93.7	93.8	93.7	93.7	93.6	93.6	100.0
JF939812_Spain	95.4	96.5	94.8	93.6	93.9	92.6	93.6	93.7	93.7	93.8	93.6	93.6	98.2	100.0
MW051363_Spain	95.8	95.5	95.2	93.6	93.8	92.5	93.4	93.6	93.5	93.7	93.5	93.6	96.2	96.2	100.0
MW051362_Spain	95.4	95.8	94.9	93.4	93.5	92.4	93.1	93.4	93.2	93.4	93.2	93.2	97.0	96.7	96.1	100.0
KR231963_South_Korea	89.2	89.0	88.7	88.9	88.6	88.4	88.7	88.7	88.7	88.8	88.6	88.9	89.2	88.8	89.2	88.9	100.0
KR231962_South_Korea	89.0	88.9	88.6	88.9	88.7	88.4	88.6	88.7	88.6	88.8	88.7	88.8	89.1	88.8	89.2	88.9	99.3	100.0
KR231961_South_Korea	89.0	88.9	88.6	88.8	88.6	88.4	88.5	88.6	88.5	88.6	88.5	88.8	89.2	88.9	89.4	88.9	98.6	98.8	100.0
KR231960_South_Korea	89.1	88.9	88.7	88.9	88.7	88.4	88.6	88.7	88.7	88.8	88.7	88.8	89.1	88.8	89.3	88.9	99.3	99.9	98.8	100.0
KR231959_South_Korea	89.0	89.0	88.6	88.8	88.6	88.4	88.5	88.6	88.5	88.7	88.5	88.8	89.2	88.9	89.4	89.0	98.6	98.8	99.9	98.8	100.0
KR231958_South_Korea	88.9	88.9	88.6	88.8	88.7	88.5	88.4	88.5	88.4	88.7	88.6	88.8	89.1	88.8	89.2	88.7	98.4	98.6	98.7	98.6	98.7	100.0
KR231957_South_Korea	88.8	88.7	88.4	88.7	88.5	88.2	88.3	88.3	88.3	88.6	88.4	88.7	88.8	88.6	89.2	88.6	98.0	98.2	98.3	98.2	98.3	98.5	100.0
KR231956_South_Korea	89.0	88.8	88.6	88.8	88.5	88.3	88.4	88.5	88.4	88.7	88.5	88.8	88.9	88.7	89.2	88.8	98.2	98.4	98.5	98.4	98.5	98.7	99.2	100.0
KR231955_South_Korea	88.7	88.7	88.3	88.7	88.5	88.3	88.3	88.4	88.3	88.6	88.4	88.6	89.0	88.6	89.1	88.6	98.5	98.6	98.6	98.6	98.7	99.3	98.4	98.6	100.0
KR231954_South_Korea	88.8	88.8	88.5	88.7	88.6	88.4	88.3	88.4	88.3	88.6	88.5	88.7	89.0	88.7	89.1	88.6	98.4	98.6	98.6	98.6	98.6	99.8	98.4	98.7	99.3	100.0
KR231953_South_Korea	89.0	88.9	88.5	88.8	88.7	88.3	88.6	88.6	88.6	88.7	88.6	88.8	89.1	88.7	89.3	88.8	99.4	99.5	98.8	99.5	98.8	98.6	98.2	98.4	98.7	98.6	100.0
KR231952_South_Korea	89.5	89.4	89.0	89.1	89.0	88.7	88.8	88.9	88.8	89.0	88.9	89.2	89.6	89.4	89.8	89.4	97.0	97.1	97.3	97.1	97.3	97.4	97.4	97.6	97.4	97.4	97.1	100.0
KR231951_South_Korea	89.1	89.1	88.6	88.9	88.9	88.4	88.6	88.6	88.6	88.7	88.6	88.8	89.4	89.2	89.6	89.2	96.5	96.7	96.7	96.7	96.8	96.7	96.4	96.6	96.6	96.7	96.6	97.8	100.0
KR231950_South_Korea	89.1	89.1	88.7	88.9	89.0	88.5	88.6	88.7	88.6	88.8	88.7	88.9	89.4	89.2	89.7	89.3	96.5	96.7	96.7	96.7	96.8	96.7	96.5	96.6	96.6	96.7	96.6	97.8	99.9	100.0
KR231949_South_Korea	89.5	89.3	89.0	89.1	89.0	88.6	88.8	88.9	88.8	89.0	88.9	89.0	89.7	89.3	89.7	89.6	97.2	97.4	97.3	97.4	97.3	97.1	97.1	97.4	97.0	97.1	97.3	98.2	98.0	98.0	100.0
KR231948_South_Korea	89.0	88.9	88.6	88.8	88.6	88.4	88.5	88.6	88.5	88.8	88.6	88.9	89.0	88.7	89.3	88.8	98.3	98.4	98.5	98.4	98.5	98.7	99.3	99.7	98.7	98.7	98.5	97.6	96.6	96.7	97.4	100.0
KR231947_South_Korea	89.4	89.1	89.0	88.9	88.9	88.5	88.7	88.7	88.6	88.9	88.8	88.9	89.4	89.2	89.7	89.3	96.5	96.6	96.6	96.6	96.6	96.8	96.7	96.9	96.7	96.8	96.6	97.6	97.4	97.5	97.9	97.0	100.0
KR231946_South_Korea	88.8	88.6	88.4	88.4	88.3	88.3	88.1	88.2	88.0	88.4	88.2	88.4	88.9	88.6	89.0	88.6	97.9	98.1	98.2	98.1	98.2	98.6	98.4	98.5	98.5	98.5	98.2	96.9	96.3	96.3	97.0	98.6	96.9	100.0
KR231945_South_Korea	88.9	88.9	88.5	88.7	88.7	88.4	88.5	88.5	88.5	88.7	88.6	88.7	89.1	88.8	89.2	88.8	98.8	99.0	98.6	99.0	98.7	98.7	98.0	98.2	98.8	98.7	99.0	96.9	96.5	96.5	97.1	98.3	96.5	98.1	100.0
KR231944_South_Korea	88.9	88.8	88.5	88.7	88.5	88.3	88.4	88.5	88.4	88.6	88.5	88.8	88.9	88.6	89.2	88.7	98.1	98.3	98.4	98.3	98.4	98.6	99.1	99.3	98.5	98.5	98.3	97.4	96.5	96.5	97.3	99.4	96.9	98.7	98.2	100.0
KR231943_South_Korea	88.9	88.7	88.5	88.7	88.6	88.2	88.5	88.5	88.5	88.6	88.5	88.6	88.9	88.7	89.2	88.6	98.6	98.8	98.5	98.8	98.5	98.9	98.3	98.5	98.9	98.9	98.8	97.1	96.7	96.7	96.9	98.5	96.6	98.2	99.1	98.4	100.0
KR231942_South_Korea	89.1	89.0	88.7	88.8	88.7	88.4	88.5	88.6	88.5	88.8	88.6	88.9	89.1	88.8	89.4	88.9	98.8	99.0	99.3	99.0	99.4	98.9	98.5	98.7	98.9	98.9	99.0	97.4	96.9	96.9	97.5	98.7	96.8	98.4	98.9	98.6	98.8	100.0
MZ508305_South_Korea	89.0	88.8	88.5	88.7	88.5	88.3	88.5	88.5	88.5	88.7	88.5	88.7	89.0	88.7	89.1	88.8	99.1	99.4	98.5	99.4	98.5	98.4	98.0	98.2	98.4	98.3	99.3	97.0	96.5	96.5	97.2	98.3	96.5	97.9	98.8	98.1	98.5	98.8	100.0
LC082306_South_Korea	89.7	89.5	89.3	89.3	89.2	88.7	88.9	89.0	89.0	89.2	89.1	89.3	89.7	89.5	89.9	89.5	96.2	96.4	96.3	96.4	96.4	96.5	96.9	97.3	96.4	96.4	96.3	97.7	97.0	97.0	97.7	97.3	97.1	96.4	96.1	97.1	96.3	96.5	96.2	100.0
MW509732_South_Korea	89.3	89.0	88.9	88.7	88.6	88.3	88.5	88.6	88.4	88.8	88.6	88.7	89.2	89.0	89.5	89.1	96.3	96.5	96.3	96.5	96.3	96.5	96.4	96.7	96.5	96.5	96.4	97.4	97.2	97.2	97.7	96.7	99.4	96.7	96.2	96.6	96.3	96.5	96.3	97.2	100.0
MG257903_South_Korea	88.8	88.8	88.4	88.7	88.6	88.3	88.4	88.6	88.4	88.7	88.6	88.8	88.9	88.7	89.1	88.7	98.2	98.4	98.8	98.4	98.8	98.8	98.6	98.8	98.8	98.8	98.4	97.7	96.5	96.5	96.9	98.9	96.6	98.3	98.3	98.7	98.5	99.2	98.2	96.6	96.4	100.0
MG257902_South_Korea	89.0	88.9	88.6	88.8	88.6	88.3	88.6	88.6	88.6	88.7	88.6	88.8	89.1	88.8	89.2	88.8	99.2	99.4	99.0	99.4	99.0	98.6	98.2	98.4	98.6	98.6	99.4	97.1	96.6	96.6	97.4	98.4	96.6	98.2	99.0	98.3	98.8	99.3	99.2	96.3	96.3	98.7	100.0
MG257901_South_Korea	89.1	89.0	88.6	88.8	88.8	88.4	88.6	88.6	88.6	88.8	88.7	88.8	89.1	88.9	89.4	88.9	99.0	99.2	99.1	99.2	99.1	98.8	98.3	98.5	98.9	98.8	99.2	97.2	96.8	96.8	97.3	98.5	96.6	98.2	99.3	98.4	99.1	99.5	99.0	96.3	96.4	98.8	99.4	100.0
MG257900_South_Korea	88.9	88.9	88.5	88.7	88.6	88.3	88.5	88.5	88.5	88.7	88.6	88.8	89.1	88.8	89.3	88.8	99.2	99.4	99.1	99.4	99.1	98.7	98.3	98.5	98.7	98.6	99.3	97.2	96.7	96.7	97.3	98.5	96.6	98.2	99.0	98.4	98.9	99.4	99.1	96.4	96.4	98.8	99.6	99.5	100.0
MG257899_South_Korea	88.9	88.9	88.5	88.9	88.7	88.5	88.6	88.7	88.6	88.8	88.7	89.0	89.0	88.8	89.3	88.9	98.6	98.8	99.0	98.8	99.0	98.8	98.2	98.4	98.7	98.7	98.8	97.1	96.8	96.8	97.4	98.4	96.7	98.1	98.7	98.3	98.5	99.3	98.6	96.4	96.4	98.6	99.0	99.1	99.2	100.0
GQ221224_Japan	89.0	88.8	88.6	88.6	88.5	88.4	88.3	88.4	88.3	88.7	88.6	88.5	89.0	88.7	89.1	88.8	97.7	97.9	97.7	97.9	97.8	98.2	97.7	97.9	98.2	98.1	97.8	97.0	96.8	96.8	97.0	97.9	96.9	98.0	97.8	97.8	97.9	97.9	97.7	96.3	96.6	97.9	97.8	97.9	97.9	97.8	100.0
GQ221223_China	89.2	89.1	88.7	88.6	88.5	88.3	88.1	88.2	88.1	88.7	88.5	88.6	89.4	89.2	89.4	89.1	95.5	95.6	95.5	95.6	95.5	95.9	95.5	95.7	95.7	95.8	95.6	96.8	96.4	96.4	96.8	95.7	96.6	95.9	95.4	95.6	95.5	95.7	95.5	96.9	96.6	95.6	95.6	95.6	95.7	95.5	96.0	100.0
EU000535_China	88.7	88.6	88.2	88.3	88.3	87.8	88.2	88.2	88.2	88.5	88.3	88.2	88.8	88.5	89.2	88.8	94.6	94.8	94.7	94.8	94.7	94.6	94.6	94.7	94.5	94.5	94.8	95.1	95.3	95.3	95.6	94.8	95.3	94.5	94.6	94.6	94.5	94.8	94.7	95.2	95.1	94.5	94.8	94.7	94.8	94.7	94.6	95.0	100.0
EU636992_China	89.5	89.5	89.1	88.9	89.0	88.5	88.7	88.7	88.7	88.8	88.7	88.7	90.0	89.6	89.8	90.0	95.4	95.5	95.5	95.6	95.5	95.5	95.4	95.5	95.6	95.4	95.5	96.4	96.3	96.3	96.9	95.6	96.6	95.6	95.5	95.5	95.3	95.7	95.4	95.9	96.3	95.4	95.6	95.5	95.6	95.6	95.6	95.4	94.3
MT943520_China	88.9	89.1	88.4	88.5	88.6	88.2	88.4	88.4	88.4	88.7	88.6	88.6	89.1	88.7	89.2	88.9	94.7	94.9	94.9	94.9	94.9	94.8	94.7	94.8	94.7	94.7	94.9	95.2	95.3	95.3	95.6	94.9	95.4	94.5	94.8	94.8	94.7	94.9	94.7	95.3	95.2	94.6	94.9	94.9	94.9	94.9	94.7	95.2	98.2
MW752438-China	89.3	89.2	88.9	89.2	89.4	88.4	89.1	89.0	89.0	89.2	89.1	89.2	89.6	89.5	89.7	89.5	95.0	95.1	94.9	95.1	94.9	95.0	94.7	94.9	94.9	94.9	95.1	95.9	95.7	95.7	96.0	95.0	96.5	94.8	95.0	94.9	94.9	95.1	95.0	95.6	96.3	94.8	95.1	95.1	95.0	95.1	94.9	95.3	94.8
MK055337_United_States	88.6	88.4	88.1	88.0	88.3	87.6	87.9	87.8	87.8	88.3	88.2	88.0	88.6	88.5	88.8	88.7	94.2	94.3	94.2	94.3	94.2	94.2	94.1	94.2	94.1	94.1	94.4	94.8	95.1	95.1	95.1	94.3	95.0	94.2	94.2	94.2	94.1	94.3	94.2	94.8	94.8	94.0	94.3	94.3	94.3	94.2	94.2	94.6	97.3
LC472499_Indonesia	87.7	87.3	87.4	87.4	87.6	86.9	87.4	87.4	87.5	87.2	87.3	87.4	87.6	87.3	87.6	87.6	88.0	88.2	87.9	88.1	87.9	87.9	87.7	87.9	88.0	87.9	88.1	88.0	88.2	88.2	88.1	88.1	88.2	88.0	88.1	87.9	88.0	88.0	88.0	88.0	88.0	87.8	88.3	88.1	88.2	88.1	88.2	87.9	87.8
KY617826_Timor-Leste	88.1	87.7	87.8	87.8	88.1	87.3	87.7	87.7	87.8	87.8	87.8	87.7	87.9	87.9	88.0	88.0	87.7	87.8	87.7	87.8	87.7	87.7	87.6	87.8	87.6	87.7	87.8	87.9	88.2	88.2	88.1	87.9	88.0	87.8	87.8	87.8	87.7	87.8	87.7	88.2	87.9	87.6	88.0	87.9	87.9	87.8	87.9	87.7	87.8
MG780352_Papua_New_Guinea	88.0	87.5	87.6	87.4	87.6	87.4	87.5	87.4	87.5	87.6	87.6	87.4	87.6	87.6	87.8	87.6	87.9	88.0	87.9	88.0	88.0	88.0	88.0	88.2	88.0	88.0	88.0	88.6	88.4	88.4	88.7	88.2	88.7	88.0	87.9	88.2	88.2	88.1	87.9	88.6	88.5	88.1	88.1	88.1	88.1	88.1	88.2	88.1	87.6
JQ700305_Taiwan	86.5	86.1	86.2	86.3	86.4	86.1	86.3	86.3	86.3	86.0	86.1	86.3	86.3	86.2	86.4	86.4	87.9	88.0	87.9	87.9	87.9	87.9	87.7	87.8	87.8	87.8	88.1	88.3	88.3	88.3	88.4	87.9	88.2	87.9	88.1	87.8	87.9	87.9	87.8	87.9	88.0	87.8	88.0	87.9	87.9	88.1	88.0	87.9	87.6
JF939813_Spain	90.8	90.6	90.4	89.8	90.1	89.4	89.8	89.7	89.8	89.7	89.7	89.7	91.4	91.3	91.3	91.4	87.1	87.1	87.1	87.1	87.1	87.1	86.9	87.0	86.9	87.0	87.0	87.6	87.3	87.4	87.7	87.1	87.8	86.9	87.1	87.0	86.9	87.1	87.0	87.7	87.6	86.9	87.1	87.2	87.1	87.0	87.1	87.3	87.3
JQ700306_Taiwan	79.6	79.6	79.2	79.8	79.5	80.1	79.7	79.7	80.4	80.6	80.5	80.3	79.7	79.6	79.7	79.8	81.5	81.6	82.2	82.2	82.2	82.2	82.1	82.4	82.2	82.2	81.6	82.6	82.3	82.3	82.6	82.4	82.3	82.0	81.6	82.2	81.6	82.2	81.5	81.6	82.2	82.3	81.7	81.6	81.7	82.1	81.8	81.4	82.0
MN688219_India	78.7	78.7	78.6	79.0	78.9	78.6	78.9	78.8	78.9	79.2	79.3	78.8	79.1	78.8	79.0	78.9	79.1	79.0	79.6	79.0	79.6	80.1	79.4	79.7	79.6	80.0	79.1	80.1	79.4	79.4	79.6	79.7	79.8	80.1	79.2	79.6	78.9	79.6	78.9	79.5	79.8	79.7	79.1	79.1	79.1	79.7	79.6	79.4	79.0
MN688220_India	78.6	78.5	78.3	78.9	78.7	79.5	78.9	79.5	79.6	79.0	79.0	79.7	79.0	78.8	78.7	78.8	78.9	78.9	78.8	78.8	78.8	78.8	78.5	78.8	79.5	78.7	78.8	79.2	79.2	79.2	79.4	78.7	80.2	78.7	79.0	78.6	78.7	78.8	78.8	79.3	80.1	78.8	78.9	78.8	78.9	79.6	79.0	78.9	78.9
HQ439023_China	79.9	80.0	79.5	80.0	79.8	80.1	79.7	79.8	80.5	80.4	80.4	80.5	80.1	79.8	80.3	80.2	83.7	83.8	83.7	83.8	83.7	83.7	83.7	83.8	84.4	83.6	83.8	84.7	84.8	84.8	85.6	83.8	85.2	83.7	83.8	83.7	83.8	83.7	83.8	84.5	85.1	83.8	83.9	83.8	83.9	83.7	84.0	84.2	84.3
LC217993_Brazil	76.6	76.8	76.2	77.1	77.5	76.6	77.0	77.0	77.0	77.4	77.3	76.9	76.7	77.0	76.2	77.0	74.2	74.4	74.4	74.4	74.5	74.3	74.2	74.4	74.2	74.3	74.4	74.3	74.3	74.1	74.3	74.4	74.0	74.1	74.2	74.2	74.3	74.4	74.3	74.6	74.1	74.1	74.3	74.5	74.4	74.4	73.8	73.9	73.6
LC217994_Brazil	76.8	77.1	76.6	77.7	78.5	77.6	77.6	77.5	77.6	78.2	78.3	77.7	77.3	77.3	76.6	77.1	74.3	74.3	74.6	74.2	74.6	74.6	74.4	74.7	74.4	74.5	74.4	74.2	74.5	74.5	74.7	74.6	74.4	74.3	74.3	74.4	74.4	74.6	74.4	75.0	74.3	74.5	74.4	74.6	74.5	74.5	74.0	74.1	73.5
LC516688_Brazil	76.3	76.8	75.9	77.1	77.6	76.6	77.0	77.1	77.1	77.4	77.3	76.9	76.9	77.0	76.6	76.4	74.0	74.1	74.2	74.1	74.2	74.2	73.9	74.1	73.9	73.9	74.2	74.0	73.9	73.9	74.3	74.1	73.8	73.9	74.1	74.0	74.0	74.1	74.0	74.8	74.1	74.0	74.1	74.2	74.2	74.3	73.8	73.8	73.6
P0 (aa)
X76931_France	100.0
MT027103_France	97.9	100.0
MZ202344_France	98.7	97.5	100.0
OP909804 (CABYV-PF-558) Brazil	90.3	90.3	89.1	100.0
OP909805 (CABYV-PF-564) Brazil	91.2	91.2	89.9	97.1	100.0
OP909806 (CABYV-PF-799) Brazil	89.5	89.9	89.1	90.8	90.8	100.0
OP909807 (CABYV-PF-724-1) Brazil	88.7	88.7	87.4	95.0	95.4	89.1	100.0
OP909808 (CABYV-PF-724-2) Brazil	90.3	90.3	89.1	97.9	96.6	90.3	96.2	100.0
OP909809 (CABYV-PF-724-3) Brazil	89.1	89.1	87.8	96.2	96.6	89.5	98.7	97.5	100.0
OP909810 (CABYV-PF-726-1) Brazil	91.2	91.2	89.9	98.7	97.5	90.3	95.4	98.3	96.6	100.0
OP909811 (CABYV-PF-726-2) Brazil	91.2	91.2	89.9	98.3	98.7	91.6	96.6	97.9	97.9	98.7	100.0
OP909812 (CABYV-PF-729) Brazil	90.8	90.8	89.5	99.2	97.9	90.8	95.8	98.7	97.1	99.6	99.2	100.0
JF939814_Spain	97.9	99.2	97.5	90.3	91.2	89.9	88.7	90.3	89.1	91.2	91.2	90.8	100.0
JF939812_Spain	97.9	98.3	96.6	91.2	92.0	89.5	89.5	91.2	89.9	92.0	92.0	91.6	98.3	100.0
MW051363_Spain	97.9	99.2	97.5	91.2	91.2	89.9	88.7	90.3	89.1	91.2	91.2	90.8	99.2	98.3	100.0
MW051362_Spain	97.5	98.7	97.1	91.2	91.2	89.9	88.7	90.3	89.1	91.2	91.2	90.8	98.7	97.9	99.6	100.0
KR231963_South_Korea	80.7	81.9	80.7	81.1	81.1	80.7	79.0	80.3	79.0	81.9	81.1	81.5	81.9	81.9	81.9	81.5	100.0
KR231962_South_Korea	81.1	82.4	80.7	81.5	81.5	81.1	79.4	80.7	79.4	82.4	81.5	81.9	82.4	82.4	82.4	81.9	98.7	100.0
KR231961_South_Korea	81.9	83.2	81.5	82.4	82.4	81.5	80.3	81.5	80.3	83.2	82.4	82.8	83.2	83.2	83.2	82.8	97.9	98.3	100.0
KR231960_South_Korea	81.1	82.4	80.7	81.5	81.5	81.1	79.4	80.7	79.4	82.4	81.5	81.9	82.4	82.4	82.4	81.9	98.7	100.0	98.3	100.0
KR231959_South_Korea	81.9	83.2	81.5	82.4	82.4	81.5	80.3	81.5	80.3	83.2	82.4	82.8	83.2	83.2	83.2	82.8	97.9	98.3	100.0	98.3	100.0
KR231958_South_Korea	81.1	82.4	80.7	82.4	82.4	81.9	80.3	81.5	80.3	83.2	82.4	82.8	82.4	82.4	82.4	81.9	96.7	97.1	97.5	97.1	97.5	100.0
KR231957_South_Korea	80.7	82.4	80.3	81.1	81.1	81.1	79.0	80.3	79.0	81.9	81.1	81.5	81.9	81.9	81.9	81.5	97.5	97.9	97.9	97.9	97.9	96.7	100.0
KR231956_South_Korea	81.1	82.4	80.3	81.5	81.5	80.7	79.4	80.7	79.4	82.4	81.5	81.9	81.9	82.4	81.9	81.5	97.5	97.9	97.9	97.9	97.9	96.7	99.2	100.0
KR231955_South_Korea	80.7	81.9	80.3	81.9	81.9	81.5	79.8	81.1	79.8	82.8	81.9	82.4	81.9	81.9	81.9	81.5	95.8	96.2	96.7	96.2	96.7	98.3	95.8	95.8	100.0
KR231954_South_Korea	80.7	81.9	80.3	81.9	81.9	81.5	79.8	81.1	79.8	82.8	81.9	82.4	81.9	81.9	81.9	81.5	95.8	96.2	96.7	96.2	96.7	98.3	95.8	95.8	99.2	100.0
KR231953_South_Korea	81.5	82.8	81.1	81.9	81.9	81.5	79.8	81.1	79.8	82.8	81.9	82.4	82.8	82.8	82.8	82.4	99.2	99.6	98.7	99.6	98.7	97.5	98.3	98.3	96.7	96.7	100.0
KR231952_South_Korea	81.9	83.2	81.5	82.4	82.4	81.9	80.3	81.5	80.3	83.2	82.4	82.8	83.2	83.2	83.2	82.8	98.7	99.2	99.2	99.2	99.2	97.9	98.7	98.7	97.1	97.1	99.6	100.0
KR231951_South_Korea	80.7	81.9	80.3	81.1	81.1	79.8	79.0	80.3	79.0	81.9	81.1	81.5	81.9	81.9	81.9	81.5	95.8	96.2	96.7	96.2	96.7	96.7	95.8	95.8	95.8	95.8	96.7	97.1	100.0
KR231950_South_Korea	80.7	82.4	80.3	81.1	81.1	79.8	79.0	80.3	79.0	81.9	81.1	81.5	81.9	81.9	81.9	81.5	95.8	96.2	96.7	96.2	96.7	96.7	96.7	96.7	95.8	95.8	96.7	97.1	99.2	100.0
KR231949_South_Korea	80.3	81.9	79.8	81.5	81.5	80.7	80.3	80.7	80.3	82.4	81.5	81.9	81.5	82.4	81.5	81.1	97.1	97.5	97.5	97.5	97.5	96.2	97.9	97.9	95.4	95.4	97.9	98.3	95.4	96.2	100.0
KR231948_South_Korea	81.1	82.8	80.7	81.5	81.5	81.1	79.4	80.7	79.4	82.4	81.5	81.9	83.2	82.4	82.4	81.9	97.9	98.3	98.3	98.3	98.3	97.1	98.7	98.7	96.2	96.2	98.7	99.2	96.2	97.1	98.3	100.0
KR231947_South_Korea	81.5	82.8	81.1	81.9	81.9	81.5	80.7	81.1	80.7	82.8	81.9	82.4	82.8	82.4	82.8	82.4	97.5	97.9	98.3	97.9	98.3	97.5	97.5	97.5	96.7	96.7	98.3	98.7	96.7	96.7	97.9	97.9	100.0
KR231946_South_Korea	81.9	83.2	81.5	81.9	81.9	81.9	79.8	81.1	79.8	82.8	81.9	82.4	83.2	82.8	83.2	82.8	95.8	96.2	97.5	96.2	97.5	95.8	95.8	95.8	95.0	95.0	96.7	97.1	95.0	95.0	95.4	96.2	97.5	100.0
KR231945_South_Korea	81.5	82.8	81.1	82.8	82.8	82.4	80.7	81.9	80.7	83.6	82.8	83.2	82.8	82.8	82.8	82.4	97.1	97.5	97.9	97.5	97.9	98.7	97.1	97.1	98.7	98.7	97.9	98.3	96.2	96.2	96.7	97.5	97.9	96.2	100.0
KR231944_South_Korea	81.1	82.4	80.7	81.1	81.1	81.5	79.0	80.3	79.0	81.9	81.1	81.5	82.4	81.9	82.4	81.9	96.2	96.7	97.1	96.7	97.1	96.2	96.2	96.2	95.4	95.4	97.1	97.5	95.4	95.4	95.8	96.7	97.9	98.7	96.7	100.0
KR231943_South_Korea	81.9	83.2	81.5	83.2	83.2	82.8	81.1	82.4	81.1	84.0	83.2	83.6	83.2	83.2	83.2	82.8	96.2	96.7	97.1	96.7	97.1	98.7	96.2	96.2	98.7	98.7	97.1	97.5	96.2	96.2	95.8	96.7	97.1	95.4	99.2	95.8	100.0
KR231942_South_Korea	80.7	81.9	80.3	81.9	81.9	81.5	79.8	81.1	79.8	82.8	81.9	82.4	81.9	81.9	81.9	81.5	97.1	97.5	97.5	97.5	97.5	97.9	97.1	97.1	97.1	97.1	97.9	98.3	96.2	96.2	96.7	97.5	97.1	95.4	97.5	95.8	97.5	100.0
MZ508305_South_Korea	81.5	82.8	81.1	81.9	81.9	81.5	79.8	81.1	79.8	82.8	81.9	82.4	82.8	82.8	82.8	82.4	99.2	99.6	98.7	99.6	98.7	97.5	98.3	98.3	96.7	96.7	100.0	99.6	96.7	96.7	97.9	98.7	98.3	96.7	97.9	97.1	97.1	97.9	100.0
LC082306_South_Korea	81.5	81.9	81.1	81.5	82.4	81.1	80.3	80.7	80.3	82.4	82.4	81.9	81.9	82.4	81.9	81.5	93.7	93.3	93.3	93.3	93.3	91.6	92.1	92.1	90.8	90.8	93.7	93.3	92.1	92.1	92.5	92.5	92.9	91.2	92.1	91.6	91.2	91.6	93.7	100.0
MW509732_South_Korea	81.1	82.4	80.7	81.5	81.5	81.1	79.4	80.7	79.4	82.4	81.5	81.9	82.4	81.9	82.4	81.9	97.1	97.5	97.9	97.5	97.9	97.1	97.1	97.1	96.2	96.2	97.9	98.3	96.2	96.2	96.7	97.5	98.7	97.1	97.5	97.5	96.7	96.7	97.9	93.3	100.0
MG257903_South_Korea	81.1	82.4	80.7	82.4	82.4	81.5	80.3	81.5	80.3	83.2	82.4	82.8	82.4	82.4	82.4	81.9	96.7	97.1	97.1	97.1	97.1	97.5	96.7	96.7	96.7	96.7	97.5	97.9	95.8	95.8	96.2	97.1	96.7	95.0	97.1	95.4	97.1	99.6	97.5	91.2	96.2	100.0
MG257902_South_Korea	81.9	82.4	81.5	81.5	81.5	81.1	79.4	80.7	79.4	82.4	81.5	81.9	82.4	82.4	82.4	81.9	98.7	99.2	98.3	99.2	98.3	97.1	97.9	97.9	96.2	96.2	99.6	99.2	96.2	96.2	97.5	98.3	97.9	96.2	97.5	96.7	96.7	97.5	99.6	93.3	97.5	97.1	100.0
MG257901_South_Korea	81.1	82.4	80.7	82.4	82.4	81.9	80.3	81.5	80.3	83.2	82.4	82.8	82.4	82.4	82.4	81.9	96.2	96.7	97.1	96.7	97.1	98.7	96.2	96.2	98.7	98.7	97.1	97.5	96.2	96.2	95.8	96.7	97.1	95.4	99.2	95.8	99.2	98.3	97.1	91.2	96.7	97.9	96.7	100.0
MG257900_South_Korea	81.5	82.8	81.1	81.9	81.9	81.5	79.8	81.1	79.8	82.8	81.9	82.4	82.8	82.8	82.8	82.4	99.2	99.6	98.7	99.6	98.7	97.5	98.3	98.3	96.7	96.7	100.0	99.6	96.7	96.7	97.9	98.7	98.3	96.7	97.9	97.1	97.1	97.9	100.0	93.7	97.9	97.5	99.6	97.1	100.0
MG257899_South_Korea	82.4	83.6	81.9	82.8	82.8	82.4	80.7	81.9	80.7	83.6	82.8	83.2	83.6	83.6	83.6	83.2	97.9	98.3	98.7	98.3	98.7	97.9	97.9	97.9	97.1	97.1	98.7	99.2	97.1	97.1	97.5	98.3	98.7	97.1	98.3	97.5	97.5	97.5	98.7	93.7	98.3	97.1	98.3	97.5	98.7	100.0
GQ221224_Japan	81.5	82.4	80.7	81.9	81.9	81.1	79.8	81.1	79.8	82.8	81.9	82.4	82.4	82.8	82.4	81.9	97.1	97.5	97.9	97.5	97.9	97.1	97.1	97.9	96.2	96.2	97.9	98.3	96.2	96.2	96.7	97.5	97.9	96.2	97.5	97.1	96.7	96.7	97.9	92.1	97.5	96.2	97.5	96.7	97.9	98.3	100.0
GQ221223_China	81.1	81.5	80.7	81.9	81.9	80.7	79.8	81.1	79.8	82.8	81.9	82.4	81.5	81.9	81.5	81.1	94.1	93.7	93.7	93.7	93.7	92.1	92.5	92.5	91.2	91.2	94.1	93.7	92.5	92.5	92.9	92.9	93.3	91.6	92.5	92.1	91.6	92.1	94.1	99.6	93.7	91.6	93.7	91.6	94.1	94.1	92.5	100.0
EU000535_China	80.3	80.3	79.8	81.1	81.1	80.3	78.6	80.3	79.0	81.9	81.1	81.5	80.3	81.1	80.3	80.3	92.5	92.9	94.1	92.9	94.1	91.6	92.1	92.1	90.8	90.8	93.3	93.3	91.2	91.2	92.5	92.5	92.5	91.6	92.1	91.2	91.2	91.6	93.3	92.5	92.1	91.2	92.9	91.2	93.3	93.7	92.1	92.9	100.0
EU636992_China	81.5	82.8	81.1	81.9	81.9	81.5	80.7	81.1	80.7	82.8	81.9	82.4	82.8	82.4	82.8	82.4	97.5	97.9	97.5	97.9	97.5	96.7	96.7	96.7	96.7	96.7	98.3	97.9	95.8	95.8	97.1	97.1	99.2	96.7	97.9	97.1	97.1	96.2	98.3	92.9	97.9	95.8	97.9	97.1	98.3	97.9	97.1	93.3	92.1
MT943520_China	80.7	81.1	80.3	83.2	82.8	81.1	80.3	81.9	80.7	82.8	82.8	83.2	81.1	81.9	81.1	81.1	90.8	91.2	92.1	91.2	92.1	90.0	90.4	90.4	89.5	89.1	91.6	91.6	90.4	90.4	90.8	90.8	90.8	89.5	90.4	89.5	89.5	90.0	91.6	91.2	90.4	89.5	91.2	89.5	91.6	92.1	90.4	91.6	95.4
MW752438-China	79.8	79.8	79.4	79.0	79.8	77.7	77.7	78.6	77.3	79.4	79.0	79.4	79.8	79.8	79.8	79.4	86.6	86.2	86.6	86.2	86.6	85.8	84.9	84.9	85.4	85.4	86.6	86.2	86.6	86.6	84.5	85.4	85.8	85.8	86.2	85.4	85.8	84.9	86.6	84.9	85.4	84.5	86.2	85.8	86.6	87.0	85.4	85.4	85.4
MK055337_United_States	80.3	81.1	79.8	83.2	82.4	81.1	80.3	81.9	80.7	82.8	82.8	83.2	81.1	81.5	81.1	81.1	90.4	90.8	91.2	90.8	91.2	90.0	90.0	90.0	89.1	89.1	91.2	91.2	89.5	89.5	90.4	90.4	91.6	91.2	90.4	90.4	89.5	89.5	91.2	89.5	91.2	89.1	90.8	89.5	91.2	92.1	90.4	90.0	94.1
LC472499_Indonesia	80.7	79.8	80.3	77.3	79.4	79.0	77.3	76.9	77.3	78.6	78.6	78.2	79.8	80.3	79.8	79.8	80.7	81.1	81.1	81.1	81.1	81.1	80.7	80.3	80.3	80.3	81.5	81.5	80.3	80.3	81.1	80.7	81.5	81.5	81.1	81.5	80.7	80.7	81.5	79.8	80.3	81.1	81.9	81.1	81.5	81.9	81.5	79.4	79.4
KY617826_Timor-Leste	79.4	78.6	79.0	75.6	76.5	76.5	75.2	74.8	75.2	76.5	76.5	76.1	78.6	79.0	78.6	78.6	78.6	79.0	79.4	79.0	79.4	79.4	78.2	77.7	78.6	78.6	79.4	79.0	78.2	78.2	78.6	78.2	79.0	79.8	79.4	78.6	79.0	78.2	79.4	79.0	79.4	78.6	79.8	79.4	79.4	79.4	78.2	78.6	79.0
MG780352_Papua_New_Guinea	76.5	76.9	76.1	75.6	76.9	75.6	76.1	76.1	76.1	76.1	76.5	76.1	76.1	76.9	76.1	76.1	77.8	77.8	78.2	77.8	78.2	77.8	77.4	77.4	77.8	77.4	78.2	78.2	76.6	77.0	78.7	77.8	78.2	77.4	78.2	77.4	77.8	77.8	78.2	76.2	77.0	78.2	78.7	78.2	78.2	77.8	77.4	75.7	76.2
JQ700305_Taiwan	74.8	73.9	73.9	76.9	77.3	73.9	73.9	76.1	74.4	76.9	76.5	76.9	73.9	75.6	74.8	74.8	77.3	77.3	77.7	77.3	77.7	76.9	76.1	76.5	76.5	76.5	77.7	77.3	76.1	76.1	76.5	76.5	76.5	76.9	76.9	76.1	77.3	76.5	77.7	75.2	76.1	76.9	77.3	76.9	77.7	77.7	77.3	75.6	77.7
JF939813_Spain	76.9	76.9	76.1	75.6	76.1	76.5	73.9	75.6	74.4	76.5	75.6	76.1	77.3	77.7	76.9	76.9	74.1	74.5	75.3	74.5	75.3	74.9	74.5	74.9	74.9	74.5	74.9	75.3	73.2	73.2	74.1	74.9	74.5	75.3	75.3	74.9	74.9	74.9	74.9	71.5	74.1	75.3	74.5	75.3	74.9	74.9	76.2	72.0	73.6
JQ700306_Taiwan	83.2	81.9	82.4	83.2	84.0	82.4	81.9	82.8	81.9	84.5	84.0	84.0	82.4	83.2	81.9	81.5	83.2	83.6	83.6	83.6	83.6	83.2	82.8	83.6	82.8	82.8	84.0	84.0	81.9	81.9	83.2	83.6	83.2	83.2	83.6	83.2	84.0	82.8	84.0	81.9	82.8	83.2	84.5	83.2	84.0	84.5	84.9	82.4	82.8
MN688219_India	69.3	68.9	69.3	68.5	69.7	67.6	68.5	68.1	68.1	68.9	69.3	68.9	69.7	69.7	68.9	68.9	70.6	70.2	70.6	70.2	70.6	70.6	69.7	70.2	69.7	69.7	70.6	70.6	69.7	69.7	69.3	70.6	69.7	69.7	69.7	69.7	70.2	70.2	70.6	68.5	69.3	70.2	71.0	69.7	70.6	70.6	71.4	68.1	68.9
MN688220_India	71.0	69.7	71.0	69.3	70.2	69.7	69.3	68.9	68.9	69.7	70.2	69.7	70.6	70.6	69.7	69.7	72.7	72.3	72.7	72.3	72.7	72.3	72.7	73.1	71.4	71.4	72.7	72.7	71.0	71.0	71.4	72.7	71.8	71.8	71.8	71.8	71.8	71.8	72.7	71.0	71.4	71.8	73.1	71.4	72.7	72.7	73.5	70.6	70.3
HQ439023_China	74.8	75.2	74.4	74.4	74.8	74.8	72.3	73.5	72.3	75.2	74.4	74.8	75.2	76.1	75.2	74.8	83.6	83.2	83.2	83.2	83.2	81.9	82.8	81.9	81.1	81.1	83.6	83.2	81.1	81.1	82.4	82.4	82.4	82.4	81.9	81.9	81.5	82.4	83.6	82.4	81.9	81.9	83.2	81.9	83.6	83.6	82.4	82.8	80.8
LC217993_Brazil	91.6	91.2	90.3	94.5	95.4	89.9	92.0	94.1	93.3	95.8	95.4	95.4	91.2	92.0	91.2	91.2	82.8	83.2	84.0	83.2	84.0	83.6	82.8	83.2	83.2	83.2	83.6	84.0	82.8	82.8	82.4	83.2	83.2	83.2	84.0	82.4	84.5	83.2	83.6	83.2	83.2	83.6	83.2	83.6	83.6	84.5	83.6	82.8	82.4
LC217994_Brazil	90.8	91.2	89.5	95.8	97.5	89.5	94.1	95.4	95.4	97.1	97.5	96.6	91.2	92.0	91.2	91.2	81.1	81.9	82.4	81.9	82.4	82.4	81.1	81.5	81.9	81.9	81.9	82.4	81.1	81.1	81.5	81.5	81.9	81.9	82.8	81.1	83.2	81.9	81.9	81.9	81.5	82.4	81.5	82.4	81.9	82.8	81.9	81.5	80.7
LC516688_Brazil	91.2	90.8	89.9	95.0	95.8	89.9	92.4	94.5	93.7	96.2	95.8	95.8	90.8	92.4	90.8	90.8	82.4	82.8	83.6	82.8	83.6	83.2	82.4	82.8	82.8	82.8	83.2	83.6	82.4	82.4	82.8	82.8	82.8	82.8	83.6	81.9	84.0	82.8	83.2	83.6	82.8	83.2	82.8	83.2	83.2	84.0	83.2	83.2	82.8
P1 (aa)
X76931_France	100.0
MT027103_France	96.5	100.0
MZ202344_France	97.5	94.8	100.0
OP909804 (CABYV-PF-558) Brazil	91.3	91.0	89.4	100.0
OP909805 (CABYV-PF-564) Brazil	92.7	92.1	90.8	95.6	100.0
OP909806 (CABYV-PF-799) Brazil	90.0	89.7	88.7	92.1	91.3	100.0
OP909807 (CABYV-PF-724-1) Brazil	91.6	91.3	89.7	97.0	94.9	92.2	100.0
OP909808 (CABYV-PF-724-2) Brazil	92.1	92.1	90.2	97.9	95.2	92.5	98.4	100.0
OP909809 (CABYV-PF-724-3) Brazil	91.7	91.7	89.8	97.5	95.1	92.2	99.2	98.6	100.0
OP909810 (CABYV-PF-726-1) Brazil	92.2	91.7	90.3	95.2	93.8	91.9	94.8	95.7	94.9	100.0
OP909811 (CABYV-PF-726-2) Brazil	92.1	91.3	90.2	95.1	94.6	92.1	95.2	95.6	95.4	99.2	100.0
OP909812 (CABYV-PF-729) Brazil	91.1	90.8	89.2	97.9	94.4	91.7	96.2	97.1	96.3	95.4	94.9	100.0
JF939814_Spain	96.2	98.4	94.4	91.0	92.1	89.7	91.0	91.7	91.4	91.7	91.3	90.5	100.0
JF939812_Spain	96.3	97.9	94.8	91.1	91.9	89.5	91.1	92.2	91.6	92.2	91.7	91.0	98.3	100.0
MW051363_Spain	98.3	97.3	96.5	91.6	93.0	90.5	91.9	92.4	92.1	92.2	92.1	91.4	97.0	96.8	100.0
MW051362_Spain	97.1	97.5	95.4	91.3	92.7	90.3	91.3	91.7	91.4	92.1	91.9	90.8	98.1	97.6	97.9	100.0
KR231963_South_Korea	88.3	87.0	86.7	85.7	87.1	85.9	86.2	86.2	86.2	86.3	86.2	86.5	87.3	87.6	88.1	87.8	100.0
KR231962_South_Korea	88.3	87.0	87.0	85.7	87.1	85.9	86.2	86.2	86.2	86.3	86.2	86.5	87.3	87.6	88.1	87.8	99.7	100.0
KR231961_South_Korea	88.3	87.0	86.7	85.7	87.1	85.9	86.2	86.2	86.2	86.3	86.2	86.5	87.3	87.6	88.1	87.8	99.7	99.7	100.0
KR231960_South_Korea	88.1	86.8	86.8	85.6	87.0	85.7	86.0	86.0	86.0	86.2	86.0	86.3	87.1	87.5	87.9	87.6	99.5	99.8	99.5	100.0
KR231959_South_Korea	88.3	87.0	86.7	85.7	87.1	85.9	86.2	86.2	86.2	86.3	86.2	86.5	87.3	87.6	88.1	87.8	99.7	99.7	99.7	99.5	100.0
KR231958_South_Korea	87.9	86.7	86.7	85.4	86.8	86.0	85.9	85.9	85.9	86.7	86.5	86.2	87.0	87.3	87.8	87.5	98.7	98.7	98.7	98.6	98.7	100.0
KR231957_South_Korea	88.3	86.7	86.7	85.1	86.5	85.6	85.6	85.6	85.6	86.3	86.2	85.9	87.0	87.3	88.1	87.8	98.7	98.7	98.7	98.6	98.7	99.0	100.0
KR231956_South_Korea	88.3	86.7	86.7	85.2	86.5	85.6	85.7	85.7	85.7	86.3	86.2	86.0	87.0	87.3	88.1	87.8	98.7	98.7	98.7	98.6	98.7	99.0	99.4	100.0
KR231955_South_Korea	88.1	86.8	86.5	85.6	87.0	86.2	86.0	86.0	86.0	86.8	86.7	86.3	87.1	87.5	87.9	87.6	98.9	98.9	98.9	98.7	98.9	99.8	99.2	99.2	100.0
KR231954_South_Korea	87.9	86.7	86.7	85.4	86.8	86.0	85.9	85.9	85.9	86.7	86.5	86.2	87.0	87.3	87.8	87.5	98.7	98.7	98.7	98.6	98.7	100.0	99.0	99.0	99.8	100.0
KR231953_South_Korea	88.1	86.8	86.7	85.6	87.0	86.0	86.0	86.0	86.0	86.2	86.0	86.3	87.1	87.5	87.9	87.6	99.5	99.5	99.5	99.4	99.5	98.6	98.6	98.6	98.7	98.6	100.0
KR231952_South_Korea	88.4	86.8	86.8	85.2	86.7	85.9	85.7	85.7	85.7	86.7	86.5	86.0	87.1	87.5	88.3	87.9	98.9	98.9	98.9	98.7	98.9	99.2	99.5	99.5	99.4	99.2	98.7	100.0
KR231951_South_Korea	87.5	85.9	85.9	85.1	86.2	85.4	85.6	85.7	85.6	85.7	85.6	86.0	86.2	86.8	87.3	87.0	98.6	98.6	98.6	98.4	98.6	97.9	97.9	97.9	98.1	97.9	98.4	98.1	100.0
KR231950_South_Korea	87.5	85.9	85.9	85.1	86.2	85.1	85.6	85.7	85.6	85.7	85.6	86.0	86.2	86.8	87.3	87.0	98.3	98.3	98.3	98.1	98.3	97.6	97.9	97.6	97.8	97.6	98.1	97.8	99.7	100.0
KR231949_South_Korea	88.3	86.5	86.7	84.9	86.3	85.6	85.7	85.7	85.7	86.2	86.0	85.7	86.8	87.1	88.1	87.6	98.6	98.6	98.6	98.4	98.6	97.6	97.9	98.3	97.8	97.6	98.4	98.1	97.8	97.5	100.0
KR231948_South_Korea	88.3	86.7	86.7	85.2	86.5	85.6	85.7	85.7	85.7	86.3	86.2	86.0	87.0	87.3	88.1	87.8	98.7	98.7	98.7	98.6	98.7	99.0	99.4	100.0	99.2	99.0	98.6	99.5	97.9	97.6	98.3	100.0
KR231947_South_Korea	88.4	86.8	86.8	85.1	86.5	85.9	85.6	85.6	85.6	86.3	86.2	85.9	87.1	87.5	87.9	87.9	98.6	98.6	98.6	98.4	98.6	98.9	98.9	98.9	99.0	98.9	98.4	99.0	98.1	97.8	97.8	98.9	100.0
KR231946_South_Korea	87.9	86.5	86.3	84.9	86.0	85.4	85.4	85.4	85.1	85.9	85.7	85.4	86.7	87.0	87.5	87.5	97.8	97.8	97.8	97.6	97.8	98.1	98.1	98.1	98.3	98.1	97.6	98.3	97.3	97.0	97.0	98.1	98.6	100.0
KR231945_South_Korea	88.3	87.0	86.7	86.0	87.5	86.3	86.5	86.5	86.5	86.7	86.5	86.8	87.3	87.6	88.1	87.8	99.4	99.4	99.4	99.2	99.4	99.0	98.4	98.4	99.2	99.0	99.2	98.6	98.6	98.3	98.3	98.4	98.6	97.8	100.0
KR231944_South_Korea	87.6	86.2	86.0	84.6	86.0	85.2	85.1	85.1	85.1	85.9	85.7	85.4	86.3	86.7	87.5	87.1	97.8	97.8	97.8	97.6	97.8	98.4	98.4	98.7	98.6	98.4	97.6	98.6	97.3	97.0	97.3	98.7	98.3	98.7	97.8	100.0
KR231943_South_Korea	87.8	86.5	86.2	85.6	87.0	85.9	86.0	86.0	86.0	86.2	86.0	86.5	86.8	87.1	87.6	87.3	99.0	99.0	99.0	98.9	99.0	98.7	98.1	98.1	98.9	98.7	98.9	98.3	98.6	98.3	97.9	98.1	98.3	97.5	99.4	97.5	100.0
KR231942_South_Korea	88.1	86.8	86.5	85.7	87.1	85.9	86.2	86.2	86.2	86.3	86.2	86.5	87.1	87.5	87.9	87.6	99.5	99.5	99.5	99.4	99.5	98.9	98.6	98.6	99.0	98.9	99.4	98.7	98.4	98.1	98.4	98.6	98.4	97.6	99.5	97.6	99.2	100.0
MZ508305_South_Korea	88.4	87.1	86.8	85.9	87.3	86.0	86.3	86.3	86.3	86.5	86.3	86.7	87.5	87.8	88.3	87.9	99.8	99.8	99.8	99.7	99.8	98.9	98.9	98.9	99.0	98.9	99.7	99.0	98.7	98.4	98.7	98.9	98.7	97.9	99.5	97.9	99.2	99.7	100.0
LC082306_South_Korea	89.8	88.4	88.3	86.3	87.9	85.9	86.8	86.8	86.8	87.3	87.1	87.1	88.7	88.7	89.7	89.4	96.4	96.4	96.4	96.2	96.4	96.7	97.0	97.6	96.8	96.7	96.2	97.1	95.6	95.2	96.2	97.6	96.5	95.7	96.0	96.4	95.7	96.2	96.5	100.0
MW509732_South_Korea	88.4	86.8	86.8	85.1	86.5	85.9	85.6	85.6	85.6	86.3	86.2	85.9	87.1	87.5	87.9	87.9	97.9	97.9	97.9	97.8	97.9	98.3	98.3	98.3	98.4	98.3	97.8	98.4	97.5	97.1	97.5	98.3	99.4	97.9	97.9	97.6	97.6	97.8	98.1	96.5	100.0
MG257903_South_Korea	87.8	86.8	86.5	85.2	86.7	85.7	85.7	85.7	85.7	86.5	86.3	86.0	86.8	87.1	87.6	87.3	98.4	98.4	98.4	98.3	98.4	99.4	98.7	98.7	99.2	99.4	98.3	98.9	97.3	97.0	97.3	98.7	98.3	97.5	98.4	97.8	98.1	98.9	98.6	96.4	97.6	100.0
MG257902_South_Korea	88.4	87.1	86.8	85.9	87.3	86.0	86.3	86.3	86.3	86.5	86.3	86.7	87.5	87.8	88.3	87.9	99.8	99.8	99.8	99.7	99.8	98.9	98.9	98.9	99.0	98.9	99.7	99.0	98.7	98.4	98.7	98.9	98.7	97.9	99.5	97.9	99.2	99.7	100.0	96.5	98.1	98.6	100.0
MG257901_South_Korea	88.1	86.8	86.5	85.9	87.3	86.2	86.3	86.3	86.3	86.5	86.3	86.7	87.1	87.5	87.9	87.6	99.5	99.5	99.5	99.4	99.5	99.2	98.6	98.6	99.4	99.2	99.4	98.7	98.7	98.4	98.4	98.6	98.7	97.9	99.8	97.9	99.5	99.7	99.7	96.2	98.1	98.6	99.7	100.0
MG257900_South_Korea	88.3	87.0	86.7	85.7	87.1	85.9	86.2	86.2	86.2	86.3	86.2	86.5	87.3	87.6	88.1	87.8	99.7	99.7	99.7	99.5	99.7	98.7	98.7	98.7	98.9	98.7	99.5	98.9	98.6	98.3	98.6	98.7	98.6	97.8	99.4	97.8	99.0	99.5	99.8	96.4	97.9	98.4	99.8	99.5	100.0
MG257899_South_Korea	87.5	86.2	85.9	85.1	86.5	85.7	85.6	85.6	85.6	85.7	85.6	85.9	86.5	86.8	87.3	87.0	98.9	98.9	98.9	98.7	98.9	98.3	97.9	97.9	98.4	98.3	98.7	98.1	98.1	97.8	97.8	97.9	98.1	97.3	98.9	97.3	98.6	98.7	99.0	95.6	97.5	97.6	99.0	99.0	98.9	100.0
GQ221224_Japan	87.9	86.3	86.3	84.6	86.0	85.4	85.1	85.1	85.1	86.2	86.0	85.4	86.7	87.0	87.5	87.5	98.1	98.1	98.1	97.9	98.1	98.7	98.7	98.7	98.9	98.7	97.9	98.9	97.9	97.6	97.3	98.7	98.9	98.1	98.1	98.1	97.8	97.9	98.3	96.4	98.3	98.1	98.3	98.3	98.4	97.6	100.0
GQ221223_China	89.8	88.6	88.3	85.9	87.6	86.2	86.3	86.3	86.3	87.8	87.6	86.7	88.9	88.9	89.4	89.2	96.4	96.4	96.4	96.2	96.4	96.7	96.8	96.7	96.8	96.7	96.2	96.8	95.2	95.1	95.6	96.7	96.5	95.7	96.2	95.7	95.7	96.2	96.5	97.8	96.5	96.4	96.5	96.2	96.4	95.6	96.4	100.0
EU000535_China	87.6	86.0	86.2	84.1	85.1	83.3	84.3	84.6	84.4	85.9	85.7	84.6	86.0	86.3	87.5	86.3	93.8	93.8	93.8	93.7	93.8	93.8	93.8	93.8	94.0	93.8	93.7	94.0	92.9	92.6	93.5	93.8	93.3	92.6	93.5	92.9	93.2	93.7	94.0	93.7	93.3	93.5	94.0	93.7	93.8	93.3	93.2	94.1	100.0
EU636992_China	88.9	87.9	87.3	85.9	87.3	86.3	86.3	86.3	86.3	86.7	86.5	86.0	88.6	88.6	89.0	89.4	95.9	95.9	95.9	95.7	95.9	95.6	95.6	95.6	95.7	95.6	96.0	95.7	95.4	95.1	95.6	95.6	96.0	95.2	96.2	94.9	95.6	95.7	96.0	93.3	95.4	94.9	96.0	96.0	95.9	95.4	95.6	93.7	91.8
MT943520_China	87.0	85.4	85.6	83.8	84.8	82.9	84.0	84.3	84.1	85.2	85.4	84.3	85.4	85.7	86.8	85.7	92.9	92.9	92.9	92.7	92.9	92.9	92.9	92.9	93.0	92.9	92.7	93.0	91.9	91.6	92.6	92.9	92.4	91.6	92.6	91.9	92.2	92.7	93.0	92.7	92.4	92.6	93.0	92.7	92.9	92.4	92.2	93.2	98.4
MW752438-China	87.5	86.2	85.9	85.4	87.0	85.6	85.9	85.9	85.9	86.0	85.9	85.9	86.3	86.7	87.3	86.8	95.4	95.4	95.4	95.2	95.4	95.1	94.8	94.8	95.2	95.1	95.6	94.9	94.6	94.3	94.6	94.8	94.9	94.1	95.4	94.1	95.1	95.4	95.6	94.1	94.9	94.6	95.6	95.6	95.4	94.9	94.4	94.4	92.7
MK055337_United_States	87.0	85.4	85.6	84.0	85.2	82.9	83.8	84.1	84.0	85.6	85.7	84.1	85.7	85.7	86.5	86.0	92.1	92.1	92.1	91.9	92.1	92.4	92.1	92.1	92.6	92.4	91.9	92.4	91.4	91.4	91.8	92.1	92.2	91.4	92.1	91.4	91.8	91.9	92.2	92.2	92.2	91.8	92.2	92.2	92.1	91.6	92.1	93.0	97.1
LC472499_Indonesia	84.5	84.0	83.3	83.2	84.5	82.0	83.0	82.7	83.0	83.7	83.7	83.7	84.7	84.7	84.7	84.5	86.5	86.5	86.5	86.3	86.5	86.5	86.5	86.1	86.6	86.5	86.3	86.3	86.0	86.3	85.5	86.1	86.6	86.1	86.5	85.8	86.3	86.3	86.6	85.6	86.3	86.1	86.6	86.6	86.8	86.0	86.8	86.5	84.7
KY617826_Timor-Leste	84.1	83.7	83.0	81.7	83.0	80.3	81.9	81.6	81.9	82.2	82.5	81.9	83.8	84.3	83.8	83.5	85.1	85.1	85.1	84.9	85.1	85.1	85.1	84.8	85.2	85.1	84.9	84.9	84.6	84.6	84.3	84.8	85.2	85.1	85.1	84.9	84.9	84.9	85.2	85.4	85.2	84.8	85.2	85.2	85.4	84.6	85.4	85.9	83.3
MG780352_Papua_New_Guinea	84.8	84.9	83.3	82.7	83.8	82.4	83.5	83.5	83.8	83.7	83.3	83.2	84.8	84.9	84.8	84.3	85.6	85.6	85.6	85.4	85.6	85.4	85.3	85.3	85.6	85.4	85.7	85.4	84.8	84.8	85.1	85.3	85.1	84.9	85.7	85.1	85.3	85.6	85.7	85.4	85.1	85.4	85.7	85.6	85.9	84.8	85.3	85.9	84.2
JQ700305_Taiwan	83.1	82.2	82.8	83.3	83.8	83.5	84.1	84.1	84.3	83.6	83.8	84.4	82.5	83.1	83.5	82.8	84.1	84.1	84.1	84.1	84.1	83.5	83.5	83.5	83.6	83.5	84.4	83.6	84.3	84.3	83.9	83.5	83.6	83.1	84.4	83.1	83.9	83.9	84.3	82.4	83.6	83.1	84.3	84.3	84.3	83.9	83.6	82.5	81.4
JF939813_Spain	83.6	83.1	83.0	80.4	82.0	80.6	81.1	80.8	81.1	81.1	80.9	81.1	83.1	82.8	83.1	83.5	83.5	83.5	83.5	83.3	83.5	83.8	83.8	83.8	84.0	83.8	83.5	84.0	83.2	83.2	83.2	83.8	83.7	83.2	83.8	83.3	83.5	83.5	83.7	82.7	83.3	83.5	83.7	83.7	83.5	83.5	83.5	83.0	82.9
JQ700306_Taiwan	66.3	67.1	65.8	66.9	66.6	66.5	65.5	66.0	65.6	67.7	67.1	66.9	66.8	67.3	66.8	66.6	68.4	68.4	68.4	68.4	68.4	68.2	68.1	67.7	68.2	68.2	68.7	68.1	68.9	69.0	67.9	67.7	68.2	67.7	68.4	67.3	68.2	68.2	68.5	66.9	68.2	68.1	68.5	68.5	68.5	68.1	68.1	67.4	66.9
MN688219_India	61.6	61.6	61.3	62.1	61.5	62.4	61.1	62.1	61.8	62.1	61.8	61.9	62.1	62.1	62.1	61.1	61.8	61.9	61.9	61.9	61.9	62.1	61.9	61.8	62.1	62.1	62.1	61.9	62.7	62.9	61.8	61.8	62.1	61.5	62.3	61.1	62.6	62.1	62.1	61.9	62.1	61.9	62.1	62.4	62.1	61.6	62.1	61.5	61.5
MN688220_India	61.9	61.8	61.9	63.1	62.1	63.1	62.7	63.1	62.7	63.1	62.7	63.4	62.6	62.4	62.4	61.8	62.6	62.9	62.9	62.9	62.9	62.7	62.6	62.4	62.7	62.7	63.1	62.6	63.4	63.5	62.6	62.4	62.7	61.8	62.9	61.9	63.2	62.7	63.1	62.7	62.7	62.6	63.1	63.1	63.1	62.6	62.9	62.6	62.1
HQ439023_China	63.2	64.2	62.7	63.4	63.4	63.1	62.6	63.1	62.9	63.4	62.7	63.5	63.9	63.7	63.7	63.5	66.3	66.3	66.3	66.3	66.3	66.1	66.3	66.0	66.1	66.1	66.5	66.3	66.8	66.9	66.1	66.0	66.6	66.0	66.3	65.5	66.6	66.1	66.5	65.5	66.6	65.6	66.5	66.5	66.5	66.0	66.8	65.3	65.3
LC217993_Brazil	92.4	92.5	90.5	92.1	94.0	90.3	93.0	92.9	93.0	93.2	93.7	91.3	92.5	92.7	92.4	92.5	87.3	87.3	87.5	87.1	87.3	87.3	87.0	87.0	87.5	87.3	87.5	87.1	86.3	86.3	86.8	87.0	87.0	86.5	87.6	86.5	87.5	87.3	87.5	87.8	87.0	87.0	87.5	87.5	87.3	86.7	86.8	87.8	85.1
LC217994_Brazil	93.3	92.5	91.4	94.3	95.9	92.5	93.8	94.4	94.0	95.2	95.4	94.4	92.5	92.4	93.7	93.2	87.3	87.3	87.3	87.1	87.3	87.0	86.7	86.7	87.1	87.0	87.1	87.0	86.3	86.3	87.0	86.7	86.7	86.2	87.6	86.2	87.1	87.3	87.5	88.1	86.7	86.8	87.5	87.5	87.3	86.7	86.2	88.1	86.2
LC516688_Brazil	92.2	92.7	90.3	91.9	93.8	90.2	92.9	92.7	92.9	93.0	93.5	91.1	92.4	92.5	92.2	92.4	87.1	87.1	87.3	87.0	87.1	87.1	86.8	86.8	87.3	87.1	87.3	87.0	86.2	86.2	86.7	86.8	86.8	86.3	87.5	86.3	87.3	87.1	87.3	87.6	86.8	87.1	87.3	87.3	87.1	86.5	86.7	87.6	84.9
P2 (aa)
X76931_France	100.0
MT027103_France	97.4	100.0
MZ202344_France	99.3	97.0	100.0
OP909804 (CABYV-PF-558) Brazil	95.7	96.4	95.5	100.0
OP909805 (CABYV-PF-564) Brazil	95.5	95.9	95.2	96.5	100.0
OP909806 (CABYV-PF-799) Brazil	96.4	96.2	96.0	95.4	96.2	100.0
OP909807 (CABYV-PF-724-1) Brazil	95.4	96.0	95.2	99.2	96.2	95.4	100.0
OP909808 (CABYV-PF-724-2) Brazil	95.4	96.0	95.2	99.2	96.2	95.4	100.0	100.0
OP909809 (CABYV-PF-724-3) Brazil	95.4	95.9	95.2	99.0	96.0	95.5	99.8	99.8	100.0
OP909810 (CABYV-PF-726-1) Brazil	97.0	96.7	96.5	96.5	96.7	97.2	96.5	96.5	96.7	100.0
OP909811 (CABYV-PF-726-2) Brazil	97.0	96.7	96.5	96.5	96.7	97.2	96.5	96.5	96.7	100.0	100.0
OP909812 (CABYV-PF-729) Brazil	94.9	95.7	94.7	98.2	95.4	95.7	98.0	98.0	98.2	96.2	96.2	100.0
JF939814_Spain	96.9	98.8	96.5	96.2	95.7	96.0	95.9	95.9	95.7	96.5	96.5	95.5	100.0
JF939812_Spain	96.9	98.8	96.5	95.9	95.4	95.7	95.5	95.5	95.4	96.2	96.2	95.2	99.0	100.0
MW051363_Spain	96.9	95.5	96.5	95.0	94.7	94.9	94.7	94.7	94.9	95.4	95.4	94.6	94.9	94.9	100.0
MW051362_Spain	96.2	98.2	95.9	95.5	95.0	95.5	95.2	95.2	95.0	95.9	95.9	94.9	99.3	98.3	94.2	100.0
KR231963_South_Korea	94.9	93.9	94.6	93.7	93.6	94.4	93.7	93.7	93.6	94.7	94.7	93.6	94.4	93.7	94.4	93.7	100.0
KR231962_South_Korea	95.2	94.2	94.9	94.1	93.9	94.7	94.1	94.1	93.9	95.0	95.0	93.9	94.7	94.1	94.7	94.1	99.3	100.0
KR231961_South_Korea	94.9	94.2	94.6	94.1	93.6	94.4	93.7	93.7	93.6	94.4	94.4	93.6	94.7	94.1	94.4	94.1	98.7	99.0	100.0
KR231960_South_Korea	95.4	94.2	95.0	94.1	93.9	94.9	94.1	94.1	94.1	95.2	95.2	94.1	94.7	94.1	94.9	94.1	99.3	99.7	99.0	100.0
KR231959_South_Korea	95.0	94.2	94.7	94.1	93.6	94.4	93.7	93.7	93.6	94.4	94.4	93.6	94.7	94.1	94.6	94.1	98.7	99.0	99.3	99.0	100.0
KR231958_South_Korea	95.2	93.9	94.9	93.6	93.9	94.6	93.2	93.2	93.1	94.2	94.2	93.2	94.4	93.7	94.6	93.7	98.2	98.2	98.2	98.2	98.3	100.0
KR231957_South_Korea	94.7	93.4	94.4	93.1	93.1	93.7	92.7	92.7	92.6	93.7	93.7	92.7	93.9	93.2	94.1	93.2	97.7	97.7	97.7	97.7	97.9	98.5	100.0
KR231956_South_Korea	95.4	94.1	95.0	93.9	93.9	94.6	93.6	93.6	93.4	94.4	94.4	93.6	94.6	93.9	94.7	93.9	98.5	98.5	98.5	98.5	98.7	99.3	98.8	100.0
KR231955_South_Korea	95.4	94.1	95.0	93.7	93.7	94.4	93.4	93.4	93.2	94.4	94.4	93.4	94.6	93.9	94.7	93.9	98.2	98.2	98.2	98.2	98.3	99.0	98.5	99.3	100.0
KR231954_South_Korea	95.2	93.9	94.9	93.6	93.9	94.6	93.2	93.2	93.1	94.2	94.2	93.2	94.4	93.7	94.6	93.7	98.2	98.2	98.2	98.2	98.3	100.0	98.5	99.3	99.0	100.0
KR231953_South_Korea	94.9	93.9	94.6	93.7	93.6	94.4	93.7	93.7	93.6	94.7	94.7	93.6	94.4	93.7	94.4	93.7	99.0	99.3	98.7	99.3	98.7	97.9	97.4	98.2	97.9	97.9	100.0
KR231952_South_Korea	95.4	94.1	95.0	93.7	93.9	94.4	93.4	93.4	93.2	94.4	94.4	93.4	94.6	93.9	94.7	93.9	98.5	98.5	98.5	98.5	98.7	99.3	98.8	99.7	99.3	99.3	98.2	100.0
KR231951_South_Korea	94.9	93.6	94.6	93.2	93.2	94.2	92.9	92.9	92.7	93.9	93.9	93.2	94.1	93.4	94.1	93.6	97.9	98.0	98.0	98.0	98.2	98.3	98.2	98.7	98.3	98.3	97.7	98.7	100.0
KR231950_South_Korea	94.7	93.4	94.4	93.1	93.1	94.1	92.7	92.7	92.6	93.7	93.7	93.1	93.9	93.2	93.9	93.4	97.7	97.9	97.9	97.9	98.0	98.2	98.0	98.5	98.2	98.2	97.5	98.5	99.8	100.0
KR231949_South_Korea	95.2	94.2	94.9	94.1	93.9	94.4	93.7	93.7	93.6	94.7	94.7	93.6	94.7	94.1	94.7	94.1	99.0	99.3	99.3	99.3	99.3	98.5	98.0	98.8	98.5	98.5	99.0	98.8	98.3	98.2	100.0
KR231948_South_Korea	95.4	94.1	95.0	93.9	93.9	94.6	93.6	93.6	93.4	94.4	94.4	93.6	94.6	93.9	94.7	93.9	98.5	98.5	98.5	98.5	98.7	99.3	98.8	100.0	99.3	99.3	98.2	99.7	98.7	98.5	98.8	100.0
KR231947_South_Korea	95.2	93.9	94.9	93.7	93.4	94.1	93.4	93.4	93.2	94.2	94.2	93.4	94.4	93.7	94.4	93.7	98.0	98.0	98.0	98.0	98.2	98.8	98.3	99.2	98.8	98.8	97.7	99.2	98.2	98.0	98.3	99.2	100.0
KR231946_South_Korea	95.4	94.1	95.0	93.6	93.6	94.2	93.2	93.2	93.1	94.4	94.4	93.2	94.6	93.9	94.6	94.2	98.0	98.0	98.0	98.0	98.2	98.8	98.3	99.2	98.8	98.8	97.7	99.2	98.2	98.0	98.3	99.2	99.0	100.0
KR231945_South_Korea	95.2	94.2	94.9	94.1	93.7	94.2	93.7	93.7	93.6	94.6	94.6	93.4	94.7	94.1	94.7	94.1	98.8	99.2	98.8	99.2	98.8	98.0	97.5	98.3	98.0	98.0	98.8	98.3	97.9	97.7	99.2	98.3	97.9	97.9	100.0
KR231944_South_Korea	94.9	93.6	94.6	93.2	93.2	93.9	92.9	92.9	92.7	93.9	93.9	92.9	94.1	93.4	94.2	93.7	98.0	98.0	98.0	98.0	98.2	98.8	98.3	99.2	98.8	98.8	97.7	99.2	98.2	98.0	98.3	99.2	98.7	99.0	97.9	100.0
KR231943_South_Korea	94.7	93.4	94.4	93.1	93.1	93.7	92.7	92.7	92.6	93.7	93.7	93.2	93.9	93.2	94.2	93.2	98.0	98.2	98.2	98.2	98.3	98.5	98.3	98.8	98.5	98.5	97.9	98.8	99.2	99.0	98.5	98.8	98.3	98.3	98.0	98.3	100.0
KR231942_South_Korea	95.4	94.4	95.0	94.2	94.1	94.6	93.9	93.9	93.7	94.9	94.9	93.7	94.9	94.2	94.9	94.2	99.2	99.5	99.5	99.5	99.5	98.7	98.2	99.0	98.7	98.7	99.2	99.0	98.5	98.3	99.8	99.0	98.5	98.5	99.3	98.5	98.7	100.0
MZ508305_South_Korea	94.2	93.2	93.9	93.1	92.9	93.7	93.1	93.1	92.9	94.1	94.1	92.9	93.7	93.1	93.7	93.1	98.3	98.7	98.0	98.7	98.0	97.2	96.7	97.5	97.2	97.2	98.3	97.5	97.0	96.9	98.3	97.5	97.0	97.0	98.2	97.0	97.2	98.5	100.0
LC082306_South_Korea	95.4	94.1	95.0	93.9	93.9	94.6	93.6	93.6	93.4	94.4	94.4	93.6	94.6	93.9	94.7	93.9	98.5	98.5	98.5	98.5	98.7	99.3	98.8	100.0	99.3	99.3	98.2	99.7	98.7	98.5	98.8	100.0	99.2	99.2	98.3	99.2	98.8	99.0	97.5	100.0
MW509732_South_Korea	95.4	94.1	95.0	93.9	93.6	94.2	93.6	93.6	93.4	94.4	94.4	93.6	94.6	93.9	94.6	93.9	98.2	98.2	98.2	98.2	98.3	99.0	98.5	99.3	99.0	99.0	97.9	99.3	98.3	98.2	98.5	99.3	99.8	99.2	98.0	98.8	98.5	98.7	97.2	99.3	100.0
MG257903_South_Korea	95.4	94.1	95.0	93.7	94.1	94.4	93.4	93.4	93.2	94.4	94.4	93.4	94.6	93.9	94.7	93.9	98.5	98.5	98.5	98.5	98.7	99.3	98.8	99.7	99.3	99.3	98.2	99.7	98.7	98.5	98.8	99.7	99.2	99.2	98.3	99.2	98.8	99.0	97.5	99.7	99.3	100.0
MG257902_South_Korea	95.4	94.4	95.0	94.2	94.1	94.9	94.2	94.2	94.1	95.2	95.2	94.1	94.9	94.2	94.9	94.2	99.5	99.8	99.2	99.8	99.2	98.3	97.9	98.7	98.3	98.3	99.5	98.7	98.2	98.0	99.5	98.7	98.2	98.2	99.3	98.2	98.3	99.7	98.8	98.7	98.3	98.7	100.0
MG257901_South_Korea	95.4	94.4	95.0	94.2	94.1	94.6	93.9	93.9	93.7	94.9	94.9	93.7	94.9	94.2	94.9	94.2	99.2	99.5	99.5	99.5	99.5	98.7	98.2	99.0	98.7	98.7	99.2	99.0	98.5	98.3	99.8	99.0	98.5	98.5	99.3	98.5	98.7	100.0	98.5	99.0	98.7	99.0	99.7	100.0
MG257900_South_Korea	95.2	94.2	94.9	94.1	93.9	94.7	94.1	94.1	93.9	95.0	95.0	93.9	94.7	94.1	94.7	94.1	99.7	99.7	99.0	99.7	99.0	98.5	98.0	98.8	98.5	98.5	99.3	98.8	98.2	98.0	99.3	98.8	98.3	98.3	99.2	98.3	98.3	99.5	98.7	98.8	98.5	98.8	99.8	99.5	100.0
MG257899_South_Korea	94.9	93.9	94.6	93.7	93.9	94.4	93.7	93.7	93.6	94.7	94.7	93.6	94.4	93.7	94.4	93.7	99.0	99.3	99.0	99.3	99.0	98.2	97.7	98.5	98.2	98.2	99.0	98.5	98.0	97.9	99.3	98.5	98.0	98.0	98.8	98.0	98.2	99.5	98.3	98.5	98.2	98.5	99.5	99.5	99.3	100.0
GQ221224_Japan	95.5	94.2	95.2	93.7	93.7	94.4	93.4	93.4	93.2	94.6	94.6	93.4	94.9	94.2	94.7	94.2	98.3	98.3	98.3	98.3	98.5	99.2	98.7	99.5	99.2	99.2	98.0	99.5	98.5	98.3	98.7	99.5	99.3	99.3	98.2	99.0	98.7	98.8	97.4	99.5	99.5	99.5	98.5	98.8	98.7	98.3	100.0
GQ221223_China	93.6	92.6	93.2	92.1	92.2	92.4	91.7	91.7	91.6	92.7	92.7	92.1	93.1	92.4	93.1	92.4	96.4	96.4	96.4	96.4	96.5	97.2	96.7	97.5	97.2	97.2	96.0	97.5	96.5	96.4	96.7	97.5	97.4	97.4	96.2	97.0	96.7	96.9	95.4	97.5	97.5	97.9	96.5	96.9	96.7	96.4	97.7	100.0
EU000535_China	93.2	92.2	92.9	91.9	91.7	92.1	91.7	91.7	91.6	92.4	92.4	91.4	92.9	92.2	93.1	92.2	96.4	96.4	96.2	96.4	96.2	96.0	95.5	96.4	96.0	96.0	96.0	96.4	95.4	95.2	96.9	96.4	95.9	95.9	96.2	95.9	95.5	96.7	95.4	96.4	96.0	96.4	96.5	96.7	96.7	96.4	96.4	94.6	100.0
EU636992_China	94.9	94.9	94.7	93.7	93.2	93.7	93.7	93.7	93.7	94.1	94.1	93.6	95.4	94.7	93.4	94.7	93.7	93.7	93.6	93.9	93.7	93.7	93.2	93.9	93.9	93.7	93.7	93.9	93.2	93.1	93.6	93.9	93.9	93.9	93.4	93.4	93.1	93.7	92.7	93.9	94.1	94.2	93.9	93.7	94.1	93.6	94.1	92.7	92.2
MT943520_China	94.0	92.9	93.7	92.7	92.4	92.9	92.4	92.4	92.2	93.2	93.2	92.2	93.7	93.1	93.2	93.1	97.2	97.2	97.2	97.2	97.2	97.0	96.5	97.4	97.0	97.0	96.9	97.4	96.4	96.2	97.5	97.4	96.9	96.9	97.0	96.9	96.5	97.7	96.2	97.4	97.0	97.4	97.4	97.7	97.5	97.2	97.4	95.5	98.5
MW752438-China	95.5	94.9	95.2	94.7	94.6	94.9	94.4	94.4	94.2	95.4	95.4	94.4	95.4	94.7	94.9	94.7	98.2	98.5	98.2	98.5	98.2	98.0	97.5	98.3	98.0	98.0	98.2	98.3	97.9	97.7	98.5	98.3	97.9	97.9	98.3	97.9	97.7	98.7	97.5	98.3	98.0	98.3	98.7	98.7	98.5	98.2	98.2	96.2	96.2
MK055337_United_States	92.9	91.6	92.4	91.4	91.3	91.4	91.1	91.1	90.9	92.4	92.4	91.1	92.4	91.7	92.2	91.7	95.9	95.9	95.9	95.9	95.9	95.7	95.2	96.0	95.7	95.7	95.5	96.0	95.0	94.9	96.2	96.0	95.9	95.9	95.7	95.5	95.4	96.4	94.9	96.0	96.0	96.0	96.0	96.4	96.2	96.0	96.4	94.7	96.9
LC472499_Indonesia	93.2	92.7	92.9	92.6	92.4	92.1	92.4	92.4	92.2	93.2	93.2	91.9	93.4	92.7	92.2	92.7	94.4	94.4	93.9	94.4	93.9	94.2	93.9	94.6	94.2	94.2	94.1	94.6	93.9	93.7	94.2	94.6	94.7	94.6	94.2	94.1	93.7	94.4	93.4	94.6	94.9	94.6	94.6	94.4	94.7	94.1	94.9	93.6	92.7
KY617826_Timor-Leste	94.5	94.1	94.2	93.9	93.7	93.6	93.7	93.7	93.6	94.4	94.4	92.9	94.6	93.9	93.4	93.9	95.9	95.9	95.4	95.9	95.4	95.7	95.2	96.2	95.7	95.7	95.5	96.0	95.4	95.2	95.7	96.2	95.9	96.0	95.7	95.5	95.2	95.9	94.9	96.2	96.0	96.0	96.0	95.9	96.2	95.5	96.2	94.9	94.1
MG780352_Papua_New_Guinea	92.7	92.2	92.6	92.7	92.6	91.7	92.4	92.4	92.2	92.9	92.9	92.1	92.7	92.1	91.7	92.1	93.7	93.7	93.7	93.7	93.9	94.6	93.9	94.7	94.7	94.6	93.4	94.7	94.1	93.9	94.1	94.7	94.2	94.2	93.6	94.4	94.1	94.2	92.7	94.7	94.4	94.9	93.9	94.2	94.1	93.7	94.6	93.4	92.7
JQ700305_Taiwan	93.7	92.6	93.4	92.6	92.6	92.7	92.2	92.2	92.1	93.2	93.2	92.6	93.2	92.6	93.4	92.6	95.0	95.0	94.7	95.0	94.9	95.0	94.6	95.2	94.9	95.0	94.7	95.2	94.9	94.7	95.0	95.2	95.0	94.9	95.0	94.7	94.7	95.2	94.1	95.2	95.2	95.5	95.2	95.2	95.4	94.7	95.2	94.2	92.9
JF939813_Spain	92.4	92.4	92.2	92.4	92.9	92.6	92.1	92.1	91.9	91.9	91.9	92.2	92.7	92.2	91.7	92.1	91.7	92.1	92.1	92.1	92.1	92.1	91.4	92.1	91.9	92.1	91.9	91.9	91.7	91.6	92.1	92.1	91.9	91.7	91.9	91.4	91.9	92.2	91.1	92.1	92.1	91.9	92.2	92.2	92.1	92.1	92.1	90.2	91.4
JQ700306_Taiwan	78.2	76.7	77.7	76.9	76.5	77.2	76.5	76.5	76.5	77.7	77.7	76.7	77.0	76.7	76.4	76.4	77.4	77.4	77.0	77.5	77.0	77.5	77.2	77.5	77.4	77.5	77.4	77.5	77.0	76.9	77.5	77.5	77.4	77.7	77.5	77.0	77.2	77.4	76.5	77.5	77.5	77.7	77.5	77.4	77.5	77.2	77.7	76.2	77.5
MN688219_India	75.7	74.0	75.2	74.5	74.4	74.7	74.2	74.2	74.2	75.2	75.2	74.5	74.4	74.0	74.2	73.5	75.0	75.0	74.7	75.2	74.7	75.6	74.7	75.2	75.0	75.6	75.0	75.0	75.0	74.9	75.2	75.2	74.9	75.4	75.2	74.5	74.9	75.0	74.2	75.2	75.0	75.2	75.2	75.0	75.2	75.0	75.2	73.7	75.4
MN688220_India	76.5	74.9	76.0	75.4	75.0	75.7	75.0	75.0	75.0	76.0	76.0	75.4	75.2	74.9	74.5	74.5	75.7	75.7	75.4	75.9	75.4	75.7	75.4	75.9	75.7	75.7	75.7	75.7	75.7	75.5	75.9	75.9	75.9	75.9	75.9	75.2	75.5	75.7	74.9	75.9	76.0	75.9	75.9	75.7	75.9	75.7	75.9	74.4	75.9
HQ439023_China	78.7	77.4	78.2	77.4	77.2	77.7	76.9	76.9	76.9	78.4	78.4	77.0	77.7	77.4	77.0	77.0	78.0	78.0	77.9	78.2	77.9	78.2	77.7	78.2	78.2	78.2	77.9	78.2	77.7	77.5	78.4	78.2	78.0	78.5	78.4	77.7	77.9	78.2	77.2	78.2	78.2	78.4	78.2	78.2	78.2	77.7	78.4	76.9	78.2
LC217993_Brazil	95.9	96.2	95.7	96.9	96.4	96.0	96.9	96.9	96.7	97.4	97.4	96.0	96.4	95.7	94.6	95.7	95.2	95.5	95.2	95.5	95.2	94.4	93.9	94.6	94.6	94.4	95.2	94.6	94.4	94.2	95.2	94.6	94.4	94.6	95.0	94.1	94.2	95.4	94.6	94.6	94.6	94.6	95.7	95.4	95.5	95.2	94.7	92.9	92.6
LC217994_Brazil	97.0	96.4	96.7	96.4	96.9	98.0	96.0	96.0	95.9	97.5	97.5	95.9	96.2	95.9	95.5	95.5	94.1	94.4	94.4	94.4	94.6	94.9	94.1	94.9	94.7	94.9	94.1	94.7	94.2	94.1	94.4	94.9	94.4	94.6	94.2	94.2	94.1	94.6	93.4	94.9	94.6	94.7	94.6	94.6	94.4	94.1	94.7	92.9	92.4
LC516688_Brazil	95.9	96.2	95.7	96.9	96.4	96.0	96.9	96.9	96.7	97.4	97.4	96.0	96.4	95.7	94.6	95.7	95.2	95.5	95.2	95.5	95.2	94.4	93.9	94.6	94.6	94.4	95.2	94.6	94.4	94.2	95.2	94.6	94.4	94.6	95.0	94.1	94.2	95.4	94.6	94.6	94.6	94.6	95.7	95.4	95.5	95.2	94.7	92.9	92.6
P3a (aa)
X76931_France	100.0
MT027103_France	100.0	100.0
MZ202344_France	100.0	100.0	100.0
OP909804 (CABYV-PF-558) Brazil	97.8	97.8	97.8	100.0
OP909805 (CABYV-PF-564) Brazil	100.0	100.0	100.0	97.8	100.0
OP909806 (CABYV-PF-799) Brazil	95.6	95.6	95.6	97.8	95.6	100.0
OP909807 (CABYV-PF-724-1) Brazil	97.8	97.8	97.8	100.0	97.8	97.8	100.0
OP909808 (CABYV-PF-724-2) Brazil	97.8	97.8	97.8	100.0	97.8	97.8	100.0	100.0
OP909809 (CABYV-PF-724-3) Brazil	97.8	97.8	97.8	100.0	97.8	97.8	100.0	100.0	100.0
OP909810 (CABYV-PF-726-1) Brazil	97.8	97.8	97.8	100.0	97.8	97.8	100.0	100.0	100.0	100.0
OP909811 (CABYV-PF-726-2) Brazil	97.8	97.8	97.8	100.0	97.8	97.8	100.0	100.0	100.0	100.0	100.0
OP909812 (CABYV-PF-729) Brazil	97.8	97.8	97.8	100.0	97.8	97.8	100.0	100.0	100.0	100.0	100.0	100.0
JF939814_Spain	100.0	100.0	100.0	97.8	100.0	95.6	97.8	97.8	97.8	97.8	97.8	97.8	100.0
JF939812_Spain	100.0	100.0	100.0	97.8	100.0	95.6	97.8	97.8	97.8	97.8	97.8	97.8	100.0	100.0
MW051363_Spain	100.0	100.0	100.0	97.8	100.0	95.6	97.8	97.8	97.8	97.8	97.8	97.8	100.0	100.0	100.0
MW051362_Spain	97.8	97.8	97.8	95.6	97.8	93.3	95.6	95.6	95.6	95.6	95.6	95.6	97.8	97.8	97.8	100.0
KR231963_South_Korea	95.6	95.6	95.6	97.8	95.6	95.6	97.8	97.8	97.8	97.8	97.8	97.8	95.6	95.6	95.6	93.3	100.0
KR231962_South_Korea	95.6	95.6	95.6	97.8	95.6	95.6	97.8	97.8	97.8	97.8	97.8	97.8	95.6	95.6	95.6	93.3	100.0	100.0
KR231961_South_Korea	95.6	95.6	95.6	97.8	95.6	95.6	97.8	97.8	97.8	97.8	97.8	97.8	95.6	95.6	95.6	93.3	100.0	100.0	100.0
KR231960_South_Korea	95.6	95.6	95.6	97.8	95.6	95.6	97.8	97.8	97.8	97.8	97.8	97.8	95.6	95.6	95.6	93.3	100.0	100.0	100.0	100.0
KR231959_South_Korea	95.6	95.6	95.6	97.8	95.6	95.6	97.8	97.8	97.8	97.8	97.8	97.8	95.6	95.6	95.6	93.3	100.0	100.0	100.0	100.0	100.0
KR231958_South_Korea	95.6	95.6	95.6	97.8	95.6	95.6	97.8	97.8	97.8	97.8	97.8	97.8	95.6	95.6	95.6	93.3	100.0	100.0	100.0	100.0	100.0	100.0
KR231957_South_Korea	95.6	95.6	95.6	97.8	95.6	95.6	97.8	97.8	97.8	97.8	97.8	97.8	95.6	95.6	95.6	93.3	100.0	100.0	100.0	100.0	100.0	100.0	100.0
KR231956_South_Korea	95.6	95.6	95.6	97.8	95.6	95.6	97.8	97.8	97.8	97.8	97.8	97.8	95.6	95.6	95.6	93.3	100.0	100.0	100.0	100.0	100.0	100.0	100.0	100.0
KR231955_South_Korea	95.6	95.6	95.6	97.8	95.6	95.6	97.8	97.8	97.8	97.8	97.8	97.8	95.6	95.6	95.6	93.3	100.0	100.0	100.0	100.0	100.0	100.0	100.0	100.0	100.0
KR231954_South_Korea	95.6	95.6	95.6	97.8	95.6	95.6	97.8	97.8	97.8	97.8	97.8	97.8	95.6	95.6	95.6	93.3	100.0	100.0	100.0	100.0	100.0	100.0	100.0	100.0	100.0	100.0
KR231953_South_Korea	95.6	95.6	95.6	97.8	95.6	95.6	97.8	97.8	97.8	97.8	97.8	97.8	95.6	95.6	95.6	93.3	100.0	100.0	100.0	100.0	100.0	100.0	100.0	100.0	100.0	100.0	100.0
KR231952_South_Korea	95.6	95.6	95.6	97.8	95.6	95.6	97.8	97.8	97.8	97.8	97.8	97.8	95.6	95.6	95.6	93.3	100.0	100.0	100.0	100.0	100.0	100.0	100.0	100.0	100.0	100.0	100.0	100.0
KR231951_South_Korea	95.6	95.6	95.6	97.8	95.6	95.6	97.8	97.8	97.8	97.8	97.8	97.8	95.6	95.6	95.6	93.3	100.0	100.0	100.0	100.0	100.0	100.0	100.0	100.0	100.0	100.0	100.0	100.0	100.0
KR231950_South_Korea	95.6	95.6	95.6	97.8	95.6	95.6	97.8	97.8	97.8	97.8	97.8	97.8	95.6	95.6	95.6	93.3	100.0	100.0	100.0	100.0	100.0	100.0	100.0	100.0	100.0	100.0	100.0	100.0	100.0	100.0
KR231949_South_Korea	95.6	95.6	95.6	97.8	95.6	95.6	97.8	97.8	97.8	97.8	97.8	97.8	95.6	95.6	95.6	93.3	100.0	100.0	100.0	100.0	100.0	100.0	100.0	100.0	100.0	100.0	100.0	100.0	100.0	100.0	100.0
KR231948_South_Korea	95.6	95.6	95.6	97.8	95.6	95.6	97.8	97.8	97.8	97.8	97.8	97.8	95.6	95.6	95.6	93.3	100.0	100.0	100.0	100.0	100.0	100.0	100.0	100.0	100.0	100.0	100.0	100.0	100.0	100.0	100.0	100.0
KR231947_South_Korea	95.6	95.6	95.6	97.8	95.6	95.6	97.8	97.8	97.8	97.8	97.8	97.8	95.6	95.6	95.6	93.3	100.0	100.0	100.0	100.0	100.0	100.0	100.0	100.0	100.0	100.0	100.0	100.0	100.0	100.0	100.0	100.0	100.0
KR231946_South_Korea	95.6	95.6	95.6	97.8	95.6	95.6	97.8	97.8	97.8	97.8	97.8	97.8	95.6	95.6	95.6	93.3	100.0	100.0	100.0	100.0	100.0	100.0	100.0	100.0	100.0	100.0	100.0	100.0	100.0	100.0	100.0	100.0	100.0	100.0
KR231945_South_Korea	95.6	95.6	95.6	97.8	95.6	95.6	97.8	97.8	97.8	97.8	97.8	97.8	95.6	95.6	95.6	93.3	100.0	100.0	100.0	100.0	100.0	100.0	100.0	100.0	100.0	100.0	100.0	100.0	100.0	100.0	100.0	100.0	100.0	100.0	100.0
KR231944_South_Korea	95.6	95.6	95.6	97.8	95.6	95.6	97.8	97.8	97.8	97.8	97.8	97.8	95.6	95.6	95.6	93.3	100.0	100.0	100.0	100.0	100.0	100.0	100.0	100.0	100.0	100.0	100.0	100.0	100.0	100.0	100.0	100.0	100.0	100.0	100.0	100.0
KR231943_South_Korea	95.6	95.6	95.6	97.8	95.6	95.6	97.8	97.8	97.8	97.8	97.8	97.8	95.6	95.6	95.6	93.3	100.0	100.0	100.0	100.0	100.0	100.0	100.0	100.0	100.0	100.0	100.0	100.0	100.0	100.0	100.0	100.0	100.0	100.0	100.0	100.0	100.0
KR231942_South_Korea	95.6	95.6	95.6	97.8	95.6	95.6	97.8	97.8	97.8	97.8	97.8	97.8	95.6	95.6	95.6	93.3	100.0	100.0	100.0	100.0	100.0	100.0	100.0	100.0	100.0	100.0	100.0	100.0	100.0	100.0	100.0	100.0	100.0	100.0	100.0	100.0	100.0	100.0
MZ508305_South_Korea	95.6	95.6	95.6	97.8	95.6	95.6	97.8	97.8	97.8	97.8	97.8	97.8	95.6	95.6	95.6	93.3	100.0	100.0	100.0	100.0	100.0	100.0	100.0	100.0	100.0	100.0	100.0	100.0	100.0	100.0	100.0	100.0	100.0	100.0	100.0	100.0	100.0	100.0	100.0
LC082306_South_Korea	95.6	95.6	95.6	97.8	95.6	95.6	97.8	97.8	97.8	97.8	97.8	97.8	95.6	95.6	95.6	93.3	100.0	100.0	100.0	100.0	100.0	100.0	100.0	100.0	100.0	100.0	100.0	100.0	100.0	100.0	100.0	100.0	100.0	100.0	100.0	100.0	100.0	100.0	100.0	100.0
MW509732_South_Korea	95.6	95.6	95.6	97.8	95.6	95.6	97.8	97.8	97.8	97.8	97.8	97.8	95.6	95.6	95.6	93.3	100.0	100.0	100.0	100.0	100.0	100.0	100.0	100.0	100.0	100.0	100.0	100.0	100.0	100.0	100.0	100.0	100.0	100.0	100.0	100.0	100.0	100.0	100.0	100.0	100.0
MG257903_South_Korea	95.6	95.6	95.6	97.8	95.6	95.6	97.8	97.8	97.8	97.8	97.8	97.8	95.6	95.6	95.6	93.3	100.0	100.0	100.0	100.0	100.0	100.0	100.0	100.0	100.0	100.0	100.0	100.0	100.0	100.0	100.0	100.0	100.0	100.0	100.0	100.0	100.0	100.0	100.0	100.0	100.0	100.0
MG257902_South_Korea	95.6	95.6	95.6	97.8	95.6	95.6	97.8	97.8	97.8	97.8	97.8	97.8	95.6	95.6	95.6	93.3	100.0	100.0	100.0	100.0	100.0	100.0	100.0	100.0	100.0	100.0	100.0	100.0	100.0	100.0	100.0	100.0	100.0	100.0	100.0	100.0	100.0	100.0	100.0	100.0	100.0	100.0	100.0
MG257901_South_Korea	95.6	95.6	95.6	97.8	95.6	95.6	97.8	97.8	97.8	97.8	97.8	97.8	95.6	95.6	95.6	93.3	100.0	100.0	100.0	100.0	100.0	100.0	100.0	100.0	100.0	100.0	100.0	100.0	100.0	100.0	100.0	100.0	100.0	100.0	100.0	100.0	100.0	100.0	100.0	100.0	100.0	100.0	100.0	100.0
MG257900_South_Korea	95.6	95.6	95.6	97.8	95.6	95.6	97.8	97.8	97.8	97.8	97.8	97.8	95.6	95.6	95.6	93.3	100.0	100.0	100.0	100.0	100.0	100.0	100.0	100.0	100.0	100.0	100.0	100.0	100.0	100.0	100.0	100.0	100.0	100.0	100.0	100.0	100.0	100.0	100.0	100.0	100.0	100.0	100.0	100.0	100.0
MG257899_South_Korea	95.6	95.6	95.6	97.8	95.6	95.6	97.8	97.8	97.8	97.8	97.8	97.8	95.6	95.6	95.6	93.3	100.0	100.0	100.0	100.0	100.0	100.0	100.0	100.0	100.0	100.0	100.0	100.0	100.0	100.0	100.0	100.0	100.0	100.0	100.0	100.0	100.0	100.0	100.0	100.0	100.0	100.0	100.0	100.0	100.0	100.0
GQ221224_Japan	95.6	95.6	95.6	97.8	95.6	95.6	97.8	97.8	97.8	97.8	97.8	97.8	95.6	95.6	95.6	93.3	100.0	100.0	100.0	100.0	100.0	100.0	100.0	100.0	100.0	100.0	100.0	100.0	100.0	100.0	100.0	100.0	100.0	100.0	100.0	100.0	100.0	100.0	100.0	100.0	100.0	100.0	100.0	100.0	100.0	100.0	100.0
GQ221223_China	95.6	95.6	95.6	97.8	95.6	95.6	97.8	97.8	97.8	97.8	97.8	97.8	95.6	95.6	95.6	93.3	100.0	100.0	100.0	100.0	100.0	100.0	100.0	100.0	100.0	100.0	100.0	100.0	100.0	100.0	100.0	100.0	100.0	100.0	100.0	100.0	100.0	100.0	100.0	100.0	100.0	100.0	100.0	100.0	100.0	100.0	100.0	100.0
EU000535_China	95.6	95.6	95.6	97.8	95.6	95.6	97.8	97.8	97.8	97.8	97.8	97.8	95.6	95.6	95.6	93.3	100.0	100.0	100.0	100.0	100.0	100.0	100.0	100.0	100.0	100.0	100.0	100.0	100.0	100.0	100.0	100.0	100.0	100.0	100.0	100.0	100.0	100.0	100.0	100.0	100.0	100.0	100.0	100.0	100.0	100.0	100.0	100.0	100.0
EU636992_China	95.6	95.6	95.6	97.8	95.6	95.6	97.8	97.8	97.8	97.8	97.8	97.8	95.6	95.6	95.6	93.3	100.0	100.0	100.0	100.0	100.0	100.0	100.0	100.0	100.0	100.0	100.0	100.0	100.0	100.0	100.0	100.0	100.0	100.0	100.0	100.0	100.0	100.0	100.0	100.0	100.0	100.0	100.0	100.0	100.0	100.0	100.0	100.0	100.0
MT943520_China	95.6	95.6	95.6	97.8	95.6	95.6	97.8	97.8	97.8	97.8	97.8	97.8	95.6	95.6	95.6	93.3	100.0	100.0	100.0	100.0	100.0	100.0	100.0	100.0	100.0	100.0	100.0	100.0	100.0	100.0	100.0	100.0	100.0	100.0	100.0	100.0	100.0	100.0	100.0	100.0	100.0	100.0	100.0	100.0	100.0	100.0	100.0	100.0	100.0
MW752438-China	95.6	95.6	95.6	97.8	95.6	95.6	97.8	97.8	97.8	97.8	97.8	97.8	95.6	95.6	95.6	93.3	100.0	100.0	100.0	100.0	100.0	100.0	100.0	100.0	100.0	100.0	100.0	100.0	100.0	100.0	100.0	100.0	100.0	100.0	100.0	100.0	100.0	100.0	100.0	100.0	100.0	100.0	100.0	100.0	100.0	100.0	100.0	100.0	100.0
MK055337_United_States	95.6	95.6	95.6	97.8	95.6	95.6	97.8	97.8	97.8	97.8	97.8	97.8	95.6	95.6	95.6	93.3	100.0	100.0	100.0	100.0	100.0	100.0	100.0	100.0	100.0	100.0	100.0	100.0	100.0	100.0	100.0	100.0	100.0	100.0	100.0	100.0	100.0	100.0	100.0	100.0	100.0	100.0	100.0	100.0	100.0	100.0	100.0	100.0	100.0
LC472499_Indonesia	95.6	95.6	95.6	97.8	95.6	100.0	97.8	97.8	97.8	97.8	97.8	97.8	95.6	95.6	95.6	93.3	95.6	95.6	95.6	95.6	95.6	95.6	95.6	95.6	95.6	95.6	95.6	95.6	95.6	95.6	95.6	95.6	95.6	95.6	95.6	95.6	95.6	95.6	95.6	95.6	95.6	95.6	95.6	95.6	95.6	95.6	95.6	95.6	95.6
KY617826_Timor-Leste	97.8	97.8	97.8	95.6	97.8	97.8	95.6	95.6	95.6	95.6	95.6	95.6	97.8	97.8	97.8	95.6	93.3	93.3	93.3	93.3	93.3	93.3	93.3	93.3	93.3	93.3	93.3	93.3	93.3	93.3	93.3	93.3	93.3	93.3	93.3	93.3	93.3	93.3	93.3	93.3	93.3	93.3	93.3	93.3	93.3	93.3	93.3	93.3	93.3
MG780352_Papua_New_Guinea	97.8	97.8	97.8	95.6	97.8	93.3	95.6	95.6	95.6	95.6	95.6	95.6	97.8	97.8	97.8	95.6	97.8	97.8	97.8	97.8	97.8	97.8	97.8	97.8	97.8	97.8	97.8	97.8	97.8	97.8	97.8	97.8	97.8	97.8	97.8	97.8	97.8	97.8	97.8	97.8	97.8	97.8	97.8	97.8	97.8	97.8	97.8	97.8	97.8
JQ700305_Taiwan	95.6	95.6	95.6	97.8	95.6	100.0	97.8	97.8	97.8	97.8	97.8	97.8	95.6	95.6	95.6	93.3	95.6	95.6	95.6	95.6	95.6	95.6	95.6	95.6	95.6	95.6	95.6	95.6	95.6	95.6	95.6	95.6	95.6	95.6	95.6	95.6	95.6	95.6	95.6	95.6	95.6	95.6	95.6	95.6	95.6	95.6	95.6	95.6	95.6
JF939813_Spain	97.8	97.8	97.8	95.6	97.8	93.3	95.6	95.6	95.6	95.6	95.6	95.6	97.8	97.8	97.8	100.0	93.3	93.3	93.3	93.3	93.3	93.3	93.3	93.3	93.3	93.3	93.3	93.3	93.3	93.3	93.3	93.3	93.3	93.3	93.3	93.3	93.3	93.3	93.3	93.3	93.3	93.3	93.3	93.3	93.3	93.3	93.3	93.3	93.3
JQ700306_Taiwan	95.6	95.6	95.6	97.8	95.6	100.0	97.8	97.8	97.8	97.8	97.8	97.8	95.6	95.6	95.6	93.3	95.6	95.6	95.6	95.6	95.6	95.6	95.6	95.6	95.6	95.6	95.6	95.6	95.6	95.6	95.6	95.6	95.6	95.6	95.6	95.6	95.6	95.6	95.6	95.6	95.6	95.6	95.6	95.6	95.6	95.6	95.6	95.6	95.6
MN688219_India	97.8	97.8	97.8	100.0	97.8	97.8	100.0	100.0	100.0	100.0	100.0	100.0	97.8	97.8	97.8	95.6	97.8	97.8	97.8	97.8	97.8	97.8	97.8	97.8	97.8	97.8	97.8	97.8	97.8	97.8	97.8	97.8	97.8	97.8	97.8	97.8	97.8	97.8	97.8	97.8	97.8	97.8	97.8	97.8	97.8	97.8	97.8	97.8	97.8
MN688220_India	97.8	97.8	97.8	100.0	97.8	97.8	100.0	100.0	100.0	100.0	100.0	100.0	97.8	97.8	97.8	95.6	97.8	97.8	97.8	97.8	97.8	97.8	97.8	97.8	97.8	97.8	97.8	97.8	97.8	97.8	97.8	97.8	97.8	97.8	97.8	97.8	97.8	97.8	97.8	97.8	97.8	97.8	97.8	97.8	97.8	97.8	97.8	97.8	97.8
HQ439023_China	95.6	95.6	95.6	97.8	95.6	95.6	97.8	97.8	97.8	97.8	97.8	97.8	95.6	95.6	95.6	93.3	100.0	100.0	100.0	100.0	100.0	100.0	100.0	100.0	100.0	100.0	100.0	100.0	100.0	100.0	100.0	100.0	100.0	100.0	100.0	100.0	100.0	100.0	100.0	100.0	100.0	100.0	100.0	100.0	100.0	100.0	100.0	100.0	100.0
LC217993_Brazil	80.0	80.0	80.0	77.8	80.0	75.6	77.8	77.8	77.8	77.8	77.8	77.8	80.0	80.0	80.0	77.8	75.6	75.6	75.6	75.6	75.6	75.6	75.6	75.6	75.6	75.6	75.6	75.6	75.6	75.6	75.6	75.6	75.6	75.6	75.6	75.6	75.6	75.6	75.6	75.6	75.6	75.6	75.6	75.6	75.6	75.6	75.6	75.6	75.6
LC217994_Brazil	80.0	80.0	80.0	77.8	80.0	75.6	77.8	77.8	77.8	77.8	77.8	77.8	80.0	80.0	80.0	77.8	75.6	75.6	75.6	75.6	75.6	75.6	75.6	75.6	75.6	75.6	75.6	75.6	75.6	75.6	75.6	75.6	75.6	75.6	75.6	75.6	75.6	75.6	75.6	75.6	75.6	75.6	75.6	75.6	75.6	75.6	75.6	75.6	75.6
LC516688_Brazil	80.0	80.0	80.0	77.8	80.0	75.6	77.8	77.8	77.8	77.8	77.8	77.8	80.0	80.0	80.0	77.8	75.6	75.6	75.6	75.6	75.6	75.6	75.6	75.6	75.6	75.6	75.6	75.6	75.6	75.6	75.6	75.6	75.6	75.6	75.6	75.6	75.6	75.6	75.6	75.6	75.6	75.6	75.6	75.6	75.6	75.6	75.6	75.6	75.6
P3 (aa)
X76931_France	100.0
MT027103_France	99.5	100.0
MZ202344_France	99.5	99.0	100.0
OP909804 (CABYV-PF-558) Brazil	99.0	98.5	98.5	100.0
OP909805 (CABYV-PF-564) Brazil	97.5	97.0	97.0	98.5	100.0
OP909806 (CABYV-PF-799) Brazil	97.0	97.5	96.5	98.0	96.5	100.0
OP909807 (CABYV-PF-724-1) Brazil	99.0	98.5	98.5	100.0	98.5	98.0	100.0
OP909808 (CABYV-PF-724-2) Brazil	99.0	98.5	98.5	100.0	98.5	98.0	100.0	100.0
OP909809 (CABYV-PF-724-3) Brazil	99.0	98.5	98.5	100.0	98.5	98.0	100.0	100.0	100.0
OP909810 (CABYV-PF-726-1) Brazil	99.0	98.5	98.5	100.0	98.5	98.0	100.0	100.0	100.0	100.0
OP909811 (CABYV-PF-726-2) Brazil	99.0	98.5	98.5	100.0	98.5	98.0	100.0	100.0	100.0	100.0	100.0
OP909812 (CABYV-PF-729) Brazil	98.0	97.5	97.5	99.0	97.5	97.0	99.0	99.0	99.0	99.0	99.0	100.0
JF939814_Spain	98.0	97.5	97.5	98.0	96.5	96.0	98.0	98.0	98.0	98.0	98.0	97.0	100.0
JF939812_Spain	98.5	98.0	98.0	98.5	97.5	96.5	98.5	98.5	98.5	98.5	98.5	97.5	97.5	100.0
MW051363_Spain	98.5	99.0	98.0	98.5	97.0	97.5	98.5	98.5	98.5	98.5	98.5	97.5	97.5	99.0	100.0
MW051362_Spain	97.0	97.5	96.5	97.0	96.0	96.0	97.0	97.0	97.0	97.0	97.0	96.0	96.5	98.0	98.5	100.0
KR231963_South_Korea	94.5	94.0	94.0	95.5	94.5	94.5	95.5	95.5	95.5	95.5	95.5	94.5	96.5	95.0	94.5	94.0	100.0
KR231962_South_Korea	95.0	94.5	94.5	96.0	95.0	95.0	96.0	96.0	96.0	96.0	96.0	95.0	96.0	95.5	95.0	94.5	99.5	100.0
KR231961_South_Korea	95.0	94.5	94.5	96.0	95.0	95.0	96.0	96.0	96.0	96.0	96.0	95.0	96.0	95.5	95.0	94.5	99.5	100.0	100.0
KR231960_South_Korea	94.0	93.5	93.5	95.0	94.0	94.0	95.0	95.0	95.0	95.0	95.0	94.0	95.0	94.5	94.0	93.5	98.5	99.0	99.0	100.0
KR231959_South_Korea	95.0	94.5	94.5	96.0	95.0	95.0	96.0	96.0	96.0	96.0	96.0	95.0	96.0	95.5	95.0	94.5	99.5	100.0	100.0	99.0	100.0
KR231958_South_Korea	94.5	94.0	94.0	95.5	94.5	94.5	95.5	95.5	95.5	95.5	95.5	94.5	95.5	95.0	94.5	94.0	99.0	99.5	99.5	98.5	99.5	100.0
KR231957_South_Korea	94.5	94.0	94.0	95.5	94.5	94.5	95.5	95.5	95.5	95.5	95.5	94.5	95.5	95.0	94.5	94.0	99.0	99.5	99.5	98.5	99.5	99.0	100.0
KR231956_South_Korea	95.0	94.5	94.5	96.0	95.0	95.0	96.0	96.0	96.0	96.0	96.0	95.0	96.0	95.5	95.0	94.5	99.5	100.0	100.0	99.0	100.0	99.5	99.5	100.0
KR231955_South_Korea	94.0	93.5	93.5	95.0	94.0	94.0	95.0	95.0	95.0	95.0	95.0	94.0	96.0	94.5	94.0	93.5	99.5	99.0	99.0	98.0	99.0	98.5	98.5	99.0	100.0
KR231954_South_Korea	94.0	93.5	93.5	95.0	94.0	94.0	95.0	95.0	95.0	95.0	95.0	94.0	95.0	94.5	94.0	93.5	98.5	99.0	99.0	98.0	99.0	98.5	98.5	99.0	98.0	100.0
KR231953_South_Korea	94.5	94.0	94.0	95.5	94.5	94.5	95.5	95.5	95.5	95.5	95.5	94.5	96.5	95.0	94.5	94.0	100.0	99.5	99.5	98.5	99.5	99.0	99.0	99.5	99.5	98.5	100.0
KR231952_South_Korea	95.5	95.0	95.0	96.5	95.5	95.5	96.5	96.5	96.5	96.5	96.5	95.5	95.5	96.0	95.5	94.5	99.0	99.5	99.5	98.5	99.5	99.0	99.0	99.5	98.5	98.5	99.0	100.0
KR231951_South_Korea	93.0	93.5	92.5	94.0	94.0	94.0	94.0	94.0	94.0	94.0	94.0	93.0	94.0	93.5	94.0	93.5	96.5	97.0	97.0	96.0	97.0	96.5	96.5	97.0	96.0	96.0	96.5	96.5	100.0
KR231950_South_Korea	93.5	94.0	93.0	94.5	94.5	94.5	94.5	94.5	94.5	94.5	94.5	93.5	94.5	94.0	94.5	94.0	97.0	97.5	97.5	96.5	97.5	97.0	97.0	97.5	96.5	96.5	97.0	97.0	99.5	100.0
KR231949_South_Korea	95.0	94.5	94.5	96.0	95.0	95.0	96.0	96.0	96.0	96.0	96.0	95.0	96.0	95.5	95.0	94.5	99.5	100.0	100.0	99.0	100.0	99.5	99.5	100.0	99.0	99.0	99.5	99.5	97.0	97.5	100.0
KR231948_South_Korea	94.5	94.0	94.0	95.5	94.5	94.5	95.5	95.5	95.5	95.5	95.5	94.5	95.5	95.0	94.5	94.0	99.0	99.5	99.5	98.5	99.5	99.0	99.0	99.5	98.5	98.5	99.0	99.0	96.5	97.0	99.5	100.0
KR231947_South_Korea	95.0	94.5	94.5	96.0	95.0	95.0	96.0	96.0	96.0	96.0	96.0	95.0	96.0	95.5	95.0	94.5	99.5	100.0	100.0	99.0	100.0	99.5	99.5	100.0	99.0	99.0	99.5	99.5	97.0	97.5	100.0	99.5	100.0
KR231946_South_Korea	95.0	94.5	94.5	96.0	95.0	95.0	96.0	96.0	96.0	96.0	96.0	95.0	96.0	95.5	95.0	94.5	99.5	100.0	100.0	99.0	100.0	99.5	99.5	100.0	99.0	99.0	99.5	99.5	97.0	97.5	100.0	99.5	100.0	100.0
KR231945_South_Korea	95.0	94.5	94.5	96.0	95.0	95.0	96.0	96.0	96.0	96.0	96.0	95.0	96.0	95.5	95.0	94.5	99.5	100.0	100.0	99.0	100.0	99.5	99.5	100.0	99.0	99.0	99.5	99.5	97.0	97.5	100.0	99.5	100.0	100.0	100.0
KR231944_South_Korea	95.0	94.5	94.5	96.0	95.0	95.0	96.0	96.0	96.0	96.0	96.0	95.0	96.0	95.5	95.0	94.5	99.5	100.0	100.0	99.0	100.0	99.5	99.5	100.0	99.0	99.0	99.5	99.5	97.0	97.5	100.0	99.5	100.0	100.0	100.0	100.0
KR231943_South_Korea	94.5	94.0	94.0	95.5	94.5	94.5	95.5	95.5	95.5	95.5	95.5	94.5	95.5	95.0	94.5	94.0	99.0	99.5	99.5	98.5	99.5	99.0	100.0	99.5	98.5	98.5	99.0	99.0	96.5	97.0	99.5	99.0	99.5	99.5	99.5	99.5	100.0
KR231942_South_Korea	94.5	94.0	94.0	95.5	94.5	94.5	95.5	95.5	95.5	95.5	95.5	94.5	95.5	95.0	94.5	94.0	99.0	99.5	99.5	98.5	99.5	99.0	99.0	99.5	98.5	98.5	99.0	99.0	96.5	97.0	99.5	99.0	99.5	99.5	99.5	99.5	99.0	100.0
MZ508305_South_Korea	94.5	94.0	94.0	95.5	94.5	94.5	95.5	95.5	95.5	95.5	95.5	94.5	95.5	95.0	94.5	94.0	99.0	99.5	99.5	98.5	99.5	99.0	99.0	99.5	98.5	98.5	99.0	99.0	96.5	97.0	99.5	99.0	99.5	99.5	99.5	99.5	99.0	99.0	100.0
LC082306_South_Korea	94.5	94.0	94.0	95.5	94.5	94.5	95.5	95.5	95.5	95.5	95.5	94.5	94.5	95.0	94.5	94.0	98.0	98.5	98.5	97.5	98.5	98.0	98.0	98.5	97.5	97.5	98.0	98.0	95.5	96.0	98.5	98.0	98.5	98.5	98.5	98.5	98.0	98.0	98.0	100.0
MW509732_South_Korea	94.5	94.0	94.0	95.5	94.5	94.5	95.5	95.5	95.5	95.5	95.5	94.5	95.5	95.0	94.5	94.0	99.0	99.5	99.5	98.5	99.5	99.0	99.0	99.5	98.5	98.5	99.0	99.0	96.5	97.0	99.5	99.0	99.5	99.5	99.5	99.5	99.0	99.0	99.0	98.0	100.0
MG257903_South_Korea	94.5	94.0	94.0	95.5	94.5	94.5	95.5	95.5	95.5	95.5	95.5	94.5	95.5	95.0	94.5	94.0	99.0	99.5	99.5	98.5	99.5	99.0	99.0	99.5	98.5	98.5	99.0	99.0	96.5	97.0	99.5	99.0	99.5	99.5	99.5	99.5	99.0	100.0	99.0	98.0	99.0	100.0
MG257902_South_Korea	94.0	93.5	93.5	95.0	94.0	94.0	95.0	95.0	95.0	95.0	95.0	94.0	95.0	94.5	94.0	93.5	98.5	99.0	99.0	98.0	99.0	98.5	98.5	99.0	98.0	98.0	98.5	98.5	96.0	96.5	99.0	98.5	99.0	99.0	99.0	99.0	98.5	99.5	98.5	97.5	98.5	99.5	100.0
MG257901_South_Korea	95.0	94.5	94.5	96.0	95.0	95.0	96.0	96.0	96.0	96.0	96.0	95.0	96.0	95.5	95.0	94.5	99.5	100.0	100.0	99.0	100.0	99.5	99.5	100.0	99.0	99.0	99.5	99.5	97.0	97.5	100.0	99.5	100.0	100.0	100.0	100.0	99.5	99.5	99.5	98.5	99.5	99.5	99.0	100.0
MG257900_South_Korea	94.5	94.0	94.0	95.5	94.5	94.5	95.5	95.5	95.5	95.5	95.5	94.5	95.5	95.0	94.5	94.0	99.0	99.5	99.5	98.5	99.5	99.0	99.0	99.5	98.5	98.5	99.0	99.0	96.5	97.0	99.5	99.0	99.5	99.5	99.5	99.5	99.0	100.0	99.0	98.0	99.0	100.0	99.5	99.5	100.0
MG257899_South_Korea	94.5	94.0	94.0	95.5	94.5	94.5	95.5	95.5	95.5	95.5	95.5	94.5	95.5	95.0	94.5	94.0	99.0	99.5	99.5	98.5	99.5	99.0	99.0	99.5	98.5	98.5	99.0	99.0	96.5	97.0	99.5	99.0	99.5	99.5	99.5	99.5	99.0	100.0	99.0	98.0	99.0	100.0	99.5	99.5	100.0	100.0
GQ221224_Japan	94.5	94.0	94.0	95.5	94.5	94.5	95.5	95.5	95.5	95.5	95.5	94.5	95.5	95.0	94.5	94.0	99.0	99.5	99.5	98.5	99.5	99.0	99.0	99.5	98.5	98.5	99.0	99.0	96.5	97.0	99.5	99.0	99.5	99.5	99.5	99.5	99.0	99.0	99.0	98.0	99.0	99.0	98.5	99.5	99.0	99.0	100.0
GQ221223_China	95.0	95.5	94.5	95.0	94.0	95.0	95.0	95.0	95.0	95.0	95.0	94.0	96.0	95.5	96.0	95.5	98.5	99.0	99.0	98.0	99.0	98.5	98.5	99.0	98.0	98.0	98.5	98.5	97.0	97.5	99.0	98.5	99.0	99.0	99.0	99.0	98.5	98.5	98.5	97.5	98.5	98.5	98.0	99.0	98.5	98.5	98.5	100.0
EU000535_China	94.0	94.5	93.5	95.0	95.0	95.0	95.0	95.0	95.0	95.0	95.0	94.0	95.0	94.5	95.0	94.5	97.5	98.0	98.0	97.0	98.0	97.5	97.5	98.0	97.0	97.0	97.5	97.5	99.0	99.5	98.0	97.5	98.0	98.0	98.0	98.0	97.5	97.5	97.5	96.5	97.5	97.5	97.0	98.0	97.5	97.5	97.5	98.0	100.0
EU636992_China	95.5	96.0	95.0	95.5	94.5	95.5	95.5	95.5	95.5	95.5	95.5	94.5	96.5	96.0	96.5	96.0	98.0	98.5	98.5	97.5	98.5	98.0	98.0	98.5	97.5	97.5	98.0	98.0	97.5	98.0	98.5	98.0	98.5	98.5	98.5	98.5	98.0	98.0	98.0	97.0	98.0	98.0	97.5	98.5	98.0	98.0	98.0	99.5	98.5
MT943520_China	94.0	94.5	93.5	95.0	95.0	95.0	95.0	95.0	95.0	95.0	95.0	94.0	95.0	94.5	95.0	94.5	97.5	98.0	98.0	97.0	98.0	97.5	97.5	98.0	97.0	97.0	97.5	97.5	98.0	98.5	98.0	97.5	98.0	98.0	98.0	98.0	97.5	97.5	97.5	96.5	97.5	97.5	97.0	98.0	97.5	97.5	97.5	98.0	99.0
MW752438-China	95.0	94.5	94.5	96.0	95.0	95.0	96.0	96.0	96.0	96.0	96.0	95.0	96.0	95.5	95.0	94.5	99.5	100.0	100.0	99.0	100.0	99.5	99.5	100.0	99.0	99.0	99.5	99.5	97.0	97.5	100.0	99.5	100.0	100.0	100.0	100.0	99.5	99.5	99.5	98.5	99.5	99.5	99.0	100.0	99.5	99.5	99.5	99.0	98.0
MK055337_United_States	93.5	93.0	93.0	93.5	94.0	92.5	93.5	93.5	93.5	93.5	93.5	92.5	95.5	94.0	93.5	93.0	97.0	96.5	96.5	95.5	96.5	96.0	96.0	96.5	96.5	95.5	97.0	96.0	96.5	97.0	96.5	96.0	96.5	96.5	96.5	96.5	96.0	96.0	96.0	95.0	96.0	96.0	95.5	96.5	96.0	96.0	96.0	96.5	97.5
LC472499_Indonesia	96.5	96.0	96.0	97.5	96.5	95.5	97.5	97.5	97.5	97.5	97.5	96.5	95.5	97.5	97.0	96.5	94.0	94.5	94.5	93.5	94.5	94.0	94.0	94.5	93.5	93.5	94.0	95.0	93.5	94.0	94.5	94.0	94.5	94.5	94.5	94.5	94.0	94.0	94.0	94.0	94.0	94.0	93.5	94.5	94.0	94.0	94.0	93.5	94.5
KY617826_Timor-Leste	96.5	96.0	96.0	97.5	96.0	95.5	97.5	97.5	97.5	97.5	97.5	96.5	96.5	97.0	97.0	96.0	94.5	95.0	95.0	94.0	95.0	94.5	94.5	95.0	94.0	94.0	94.5	94.5	94.0	94.5	95.0	94.5	95.0	95.0	95.0	95.0	94.5	94.5	94.5	94.5	94.5	94.5	94.0	95.0	94.5	94.5	94.5	94.0	95.0
MG780352_Papua_New_Guinea	95.5	95.0	95.0	96.5	95.5	95.5	96.5	96.5	96.5	96.5	96.5	95.5	95.5	96.5	96.0	95.0	96.0	96.5	96.5	95.5	96.5	96.0	96.0	96.5	95.5	95.5	96.0	97.0	95.0	95.5	96.5	96.0	96.5	96.5	96.5	96.5	96.0	96.0	96.0	95.0	96.0	96.0	95.5	96.5	96.0	96.0	96.0	95.5	95.5
JQ700305_Taiwan	96.0	96.5	95.5	97.0	95.5	97.0	97.0	97.0	97.0	97.0	97.0	96.0	96.0	95.5	96.5	95.0	96.5	97.0	97.0	96.0	97.0	96.5	96.5	97.0	96.0	96.0	96.5	97.5	95.5	96.0	97.0	96.5	97.0	97.0	97.0	97.0	96.5	96.5	96.5	95.5	96.5	96.5	96.0	97.0	96.5	96.5	96.5	97.0	96.0
JF939813_Spain	95.0	95.5	94.5	96.0	94.5	95.0	96.0	96.0	96.0	96.0	96.0	95.0	94.0	95.5	96.5	96.0	92.0	92.5	92.5	91.5	92.5	92.0	92.0	92.5	91.5	91.5	92.0	93.0	92.5	93.0	92.5	92.0	92.5	92.5	92.5	92.5	92.0	92.0	92.0	92.0	92.0	92.0	91.5	92.5	92.0	92.0	92.0	92.5	93.5
JQ700306_Taiwan	96.0	96.5	95.5	97.0	95.5	96.0	97.0	97.0	97.0	97.0	97.0	96.0	96.0	96.0	97.0	96.0	95.0	95.5	95.5	94.5	95.5	95.0	95.0	95.5	94.5	94.5	95.0	96.0	94.5	95.0	95.5	95.0	95.5	95.5	95.5	95.5	95.0	95.0	95.0	94.0	95.0	95.0	94.5	95.5	95.0	95.0	95.5	95.5	95.5
MN688219_India	96.0	96.5	95.5	97.0	96.0	97.0	97.0	97.0	97.0	97.0	97.0	96.0	95.0	96.0	96.5	96.0	95.0	95.5	95.5	94.5	95.5	95.0	95.0	95.5	94.5	94.5	95.0	96.0	94.5	95.0	95.5	95.0	95.5	95.5	95.5	95.5	95.0	95.0	95.0	95.0	95.0	95.0	94.5	95.5	95.0	95.0	95.0	95.5	95.5
MN688220_India	95.0	95.5	94.5	96.0	95.0	96.0	96.0	96.0	96.0	96.0	96.0	95.0	94.0	95.0	95.5	94.5	94.5	95.0	95.0	94.0	95.0	94.5	94.5	95.0	94.0	94.0	94.5	95.5	94.0	94.5	95.0	94.5	95.0	95.0	95.0	95.0	94.5	94.5	94.5	94.5	94.5	94.5	94.0	95.0	94.5	94.5	94.5	95.0	95.0
HQ439023_China	94.5	95.0	94.0	95.5	95.5	95.5	95.5	95.5	95.5	95.5	95.5	94.5	94.5	95.0	95.5	94.5	97.0	97.5	97.5	96.5	97.5	97.0	97.0	97.5	96.5	96.5	97.0	98.0	97.5	98.0	97.5	97.0	97.5	97.5	97.5	97.5	97.0	97.0	97.0	96.0	97.0	97.0	96.5	97.5	97.0	97.0	97.0	97.5	98.5
LC217993_Brazil	57.1	55.8	56.6	57.1	57.1	57.1	57.1	57.1	57.1	57.1	57.1	55.8	56.6	56.1	55.8	55.8	56.6	56.6	56.6	56.1	56.6	56.1	56.1	56.6	56.1	55.6	56.6	56.6	56.6	57.1	56.6	56.6	56.6	56.6	56.6	56.6	56.1	56.1	56.1	56.1	56.6	56.1	55.6	56.6	56.1	56.1	56.6	56.1	56.6
LC217994_Brazil	57.1	55.8	56.6	57.1	57.1	57.1	57.1	57.1	57.1	57.1	57.1	55.8	56.6	56.1	55.8	55.8	56.6	56.6	56.6	56.1	56.6	56.1	56.1	56.6	56.1	55.6	56.6	56.6	56.6	57.1	56.6	56.6	56.6	56.6	56.6	56.6	56.1	56.1	56.1	56.1	56.6	56.1	55.6	56.6	56.1	56.1	56.6	56.1	56.6
LC516688_Brazil	57.1	55.8	56.6	57.1	57.1	57.1	57.1	57.1	57.1	57.1	57.1	55.8	56.6	56.1	55.8	55.8	56.6	56.6	56.6	56.1	56.6	56.1	56.1	56.6	56.1	55.6	56.6	56.6	56.6	57.1	56.6	56.6	56.6	56.6	56.6	56.6	56.1	56.1	56.1	56.1	56.6	56.1	55.6	56.6	56.1	56.1	56.6	56.1	56.6
P4 (aa)
X76931_France	100.0
MT027103_France	99.0	100.0
MZ202344_France	98.4	98.4	100.0
OP909804 (CABYV-PF-558) Brazil	95.8	95.8	95.3	100.0
OP909805 (CABYV-PF-564) Brazil	95.3	95.3	94.8	99.0	100.0
OP909806 (CABYV-PF-799) Brazil	96.9	95.8	95.3	97.9	96.9	100.0
OP909807 (CABYV-PF-724-1) Brazil	95.8	95.8	95.3	100.0	99.0	97.9	100.0
OP909808 (CABYV-PF-724-2) Brazil	95.8	95.8	95.3	100.0	99.0	97.9	100.0	100.0
OP909809 (CABYV-PF-724-3) Brazil	95.8	95.8	95.3	100.0	99.0	97.9	100.0	100.0	100.0
OP909810 (CABYV-PF-726-1) Brazil	95.8	95.8	95.3	100.0	99.0	97.9	100.0	100.0	100.0	100.0
OP909811 (CABYV-PF-726-2) Brazil	95.8	95.8	95.3	100.0	99.0	97.9	100.0	100.0	100.0	100.0	100.0
OP909812 (CABYV-PF-729) Brazil	95.8	95.8	95.3	99.5	98.4	97.9	99.5	99.5	99.5	99.5	99.5	100.0
JF939814_Spain	94.8	94.8	94.2	93.7	92.7	94.8	93.7	93.7	93.7	93.7	93.7	93.7	100.0
JF939812_Spain	94.8	94.8	94.2	93.7	92.7	94.8	93.7	93.7	93.7	93.7	93.7	93.7	99.0	100.0
MW051363_Spain	95.8	94.8	94.2	93.7	92.7	95.8	93.7	93.7	93.7	93.7	93.7	93.7	96.9	96.9	100.0
MW051362_Spain	94.8	94.8	94.2	94.8	93.7	93.7	94.8	94.8	94.8	94.8	94.8	94.2	94.8	94.8	93.7	100.0
KR231963_South_Korea	89.0	89.0	87.4	86.9	85.9	89.0	86.9	86.9	86.9	86.9	86.9	86.9	90.6	89.5	89.5	86.9	100.0
KR231962_South_Korea	89.5	90.6	89.0	88.5	87.4	89.5	88.5	88.5	88.5	88.5	88.5	88.5	91.1	90.1	90.1	87.4	98.4	100.0
KR231961_South_Korea	89.5	90.6	89.0	88.5	87.4	89.5	88.5	88.5	88.5	88.5	88.5	88.5	91.1	90.1	90.1	87.4	98.4	100.0	100.0
KR231960_South_Korea	89.0	90.1	88.5	88.0	86.9	89.0	88.0	88.0	88.0	88.0	88.0	88.0	90.6	89.5	89.5	86.9	97.9	99.5	99.5	100.0
KR231959_South_Korea	89.5	90.6	89.0	88.5	87.4	89.5	88.5	88.5	88.5	88.5	88.5	88.5	91.1	90.1	90.1	87.4	98.4	100.0	100.0	99.5	100.0
KR231958_South_Korea	89.0	90.1	88.5	88.0	86.9	89.0	88.0	88.0	88.0	88.0	88.0	88.0	90.6	89.5	89.5	86.9	97.9	99.5	99.5	99.0	99.5	100.0
KR231957_South_Korea	89.0	90.1	88.5	88.0	86.9	89.0	88.0	88.0	88.0	88.0	88.0	88.0	90.6	89.5	89.5	86.9	97.4	99.0	99.0	98.4	99.0	98.4	100.0
KR231956_South_Korea	90.1	91.1	89.5	89.0	88.0	90.1	89.0	89.0	89.0	89.0	89.0	89.0	91.6	90.6	89.5	88.0	97.9	99.5	99.5	99.0	99.5	99.0	98.4	100.0
KR231955_South_Korea	89.5	90.6	89.0	88.5	87.4	89.5	88.5	88.5	88.5	88.5	88.5	88.5	91.1	90.1	90.1	87.4	98.4	100.0	100.0	99.5	100.0	99.5	99.0	99.5	100.0
KR231954_South_Korea	88.5	89.5	88.0	87.4	86.4	88.5	87.4	87.4	87.4	87.4	87.4	87.4	90.1	89.0	89.0	86.4	97.4	99.0	99.0	98.4	99.0	98.4	97.9	98.4	99.0	100.0
KR231953_South_Korea	89.0	90.1	88.5	88.0	86.9	89.0	88.0	88.0	88.0	88.0	88.0	88.0	90.6	89.5	89.5	86.9	97.9	99.5	99.5	99.0	99.5	99.0	98.4	99.0	99.5	98.4	100.0
KR231952_South_Korea	90.1	90.1	88.5	88.0	86.9	90.1	88.0	88.0	88.0	88.0	88.0	88.0	90.6	89.5	90.6	86.9	99.0	99.5	99.5	99.0	99.5	99.0	98.4	99.0	99.5	98.4	99.0	100.0
KR231951_South_Korea	90.6	90.6	90.1	89.5	88.5	90.6	89.5	89.5	89.5	89.5	89.5	89.5	92.1	91.1	91.1	88.5	96.3	97.9	97.9	97.4	97.9	97.4	96.9	97.4	97.9	96.9	97.4	97.4	100.0
KR231950_South_Korea	90.6	90.6	90.1	89.5	88.5	90.6	89.5	89.5	89.5	89.5	89.5	89.5	92.1	91.1	91.1	88.5	96.3	97.9	97.9	97.4	97.9	97.4	96.9	97.4	97.9	96.9	97.4	97.4	100.0	100.0
KR231949_South_Korea	89.5	90.6	89.0	88.5	87.4	89.5	88.5	88.5	88.5	88.5	88.5	88.5	91.1	90.1	90.1	87.4	98.4	100.0	100.0	99.5	100.0	99.5	99.0	99.5	100.0	99.0	99.5	99.5	97.9	97.9	100.0
KR231948_South_Korea	90.1	91.1	89.5	89.0	88.0	90.1	89.0	89.0	89.0	89.0	89.0	89.0	91.6	90.6	89.5	88.0	97.9	99.5	99.5	99.0	99.5	99.0	98.4	100.0	99.5	98.4	99.0	99.0	97.4	97.4	99.5	100.0
KR231947_South_Korea	90.6	90.6	89.0	88.5	87.4	90.6	88.5	88.5	88.5	88.5	88.5	88.5	91.1	90.1	91.1	87.4	98.4	99.0	99.0	98.4	99.0	98.4	97.9	98.4	99.0	97.9	98.4	99.5	96.9	96.9	99.0	98.4	100.0
KR231946_South_Korea	89.0	90.1	88.5	88.0	86.9	89.0	88.0	88.0	88.0	88.0	88.0	88.0	91.6	90.6	90.6	86.9	97.9	99.5	99.5	99.0	99.5	99.0	98.4	99.0	99.5	98.4	99.0	99.0	97.4	97.4	99.5	99.0	98.4	100.0
KR231945_South_Korea	89.5	90.6	89.0	88.5	87.4	89.5	88.5	88.5	88.5	88.5	88.5	88.5	91.1	90.1	90.1	87.4	98.4	100.0	100.0	99.5	100.0	99.5	99.0	99.5	100.0	99.0	99.5	99.5	97.9	97.9	100.0	99.5	99.0	99.5	100.0
KR231944_South_Korea	89.5	90.6	89.0	88.5	87.4	89.5	88.5	88.5	88.5	88.5	88.5	88.5	91.1	90.1	90.1	87.4	98.4	100.0	100.0	99.5	100.0	99.5	99.0	99.5	100.0	99.0	99.5	99.5	97.9	97.9	100.0	99.5	99.0	99.5	100.0	100.0
KR231943_South_Korea	88.5	89.5	88.0	87.4	86.4	88.5	87.4	87.4	87.4	87.4	87.4	87.4	90.1	89.0	89.0	86.4	97.4	99.0	99.0	98.4	99.0	98.4	99.0	98.4	99.0	97.9	99.5	98.4	96.9	96.9	99.0	98.4	97.9	98.4	99.0	99.0	100.0
KR231942_South_Korea	89.0	90.1	88.5	88.5	87.4	89.5	88.5	88.5	88.5	88.5	88.5	88.5	90.6	89.5	89.5	86.9	97.9	99.5	99.5	99.0	99.5	99.0	98.4	99.0	99.5	98.4	99.0	99.0	97.4	97.4	99.5	99.0	98.4	99.0	99.5	99.5	98.4	100.0
MZ508305_South_Korea	89.5	90.6	89.0	88.5	87.4	89.5	88.5	88.5	88.5	88.5	88.5	88.5	91.1	90.1	90.1	87.4	98.4	100.0	100.0	99.5	100.0	99.5	99.0	99.5	100.0	99.0	99.5	99.5	97.9	97.9	100.0	99.5	99.0	99.5	100.0	100.0	99.0	99.5	100.0
LC082306_South_Korea	89.0	90.1	88.5	88.0	86.9	89.0	88.0	88.0	88.0	88.0	88.0	88.0	89.5	88.5	88.5	86.9	95.8	97.4	97.4	96.9	97.4	96.9	96.3	97.9	97.4	96.3	96.9	96.9	95.3	95.3	97.4	97.9	96.3	96.9	97.4	97.4	96.3	96.9	97.4	100.0
MW509732_South_Korea	90.6	90.6	89.0	88.5	87.4	90.6	88.5	88.5	88.5	88.5	88.5	88.5	91.1	90.1	91.1	87.4	98.4	99.0	99.0	98.4	99.0	98.4	97.9	98.4	99.0	97.9	98.4	99.5	96.9	96.9	99.0	98.4	100.0	98.4	99.0	99.0	97.9	98.4	99.0	96.3	100.0
MG257903_South_Korea	88.5	89.5	88.0	89.0	88.0	90.1	89.0	89.0	89.0	89.0	89.0	89.0	90.1	89.0	89.0	86.4	97.4	99.0	99.0	98.4	99.0	98.4	97.9	98.4	99.0	97.9	98.4	98.4	96.9	96.9	99.0	98.4	97.9	98.4	99.0	99.0	97.9	99.5	99.0	96.3	97.9	100.0
MG257902_South_Korea	89.0	90.1	88.5	88.5	87.4	89.5	88.5	88.5	88.5	88.5	88.5	88.5	90.6	89.5	89.5	86.9	97.9	99.5	99.5	99.0	99.5	99.0	98.4	99.0	99.5	98.4	99.0	99.0	97.4	97.4	99.5	99.0	98.4	99.0	99.5	99.5	98.4	100.0	99.5	96.9	98.4	99.5	100.0
MG257901_South_Korea	89.5	90.6	89.0	88.5	87.4	89.5	88.5	88.5	88.5	88.5	88.5	88.5	91.1	90.1	90.1	87.4	98.4	100.0	100.0	99.5	100.0	99.5	99.0	99.5	100.0	99.0	99.5	99.5	97.9	97.9	100.0	99.5	99.0	99.5	100.0	100.0	99.0	99.5	100.0	97.4	99.0	99.0	99.5	100.0
MG257900_South_Korea	89.0	90.1	88.5	88.5	87.4	89.5	88.5	88.5	88.5	88.5	88.5	88.5	90.6	89.5	89.5	86.9	97.9	99.5	99.5	99.0	99.5	99.0	98.4	99.0	99.5	98.4	99.0	99.0	97.4	97.4	99.5	99.0	98.4	99.0	99.5	99.5	98.4	100.0	99.5	96.9	98.4	99.5	100.0	99.5	100.0
MG257899_South_Korea	88.5	89.5	88.0	88.0	86.9	89.0	88.0	88.0	88.0	88.0	88.0	88.0	90.1	89.0	89.0	86.4	96.3	97.9	97.9	97.4	97.9	97.4	96.9	97.4	97.9	96.9	97.4	97.4	95.8	95.8	97.9	97.4	97.9	97.4	97.9	97.9	96.9	98.4	97.9	95.3	97.9	97.9	98.4	97.9	98.4	100.0
GQ221224_Japan	89.5	90.6	89.0	88.5	87.4	89.5	88.5	88.5	88.5	88.5	88.5	88.5	91.1	90.1	90.1	87.4	98.4	100.0	100.0	99.5	100.0	99.5	99.0	99.5	100.0	99.0	99.5	99.5	97.9	97.9	100.0	99.5	99.0	99.5	100.0	100.0	99.0	99.5	100.0	97.4	99.0	99.0	99.5	100.0	99.5	97.9	100.0
GQ221223_China	89.0	89.0	87.4	88.0	86.9	89.0	88.0	88.0	88.0	88.0	88.0	88.0	90.6	89.5	90.6	85.9	96.9	97.4	97.4	96.9	97.4	96.9	96.3	96.9	97.4	96.3	96.9	97.9	95.3	95.3	97.4	96.9	98.4	97.9	97.4	97.4	96.3	96.9	97.4	94.8	98.4	96.3	96.9	97.4	96.9	96.3	97.4	100.0
EU000535_China	90.1	90.1	89.5	89.0	88.0	90.1	89.0	89.0	89.0	89.0	89.0	89.0	92.7	91.6	91.6	88.0	96.9	98.4	98.4	97.9	98.4	97.9	97.4	97.9	98.4	97.4	97.9	97.9	98.4	98.4	98.4	97.9	97.4	99.0	98.4	98.4	97.4	97.9	98.4	95.8	97.4	97.4	97.9	98.4	97.9	96.3	98.4	96.9	100.0
EU636992_China	91.6	90.6	90.1	89.5	88.5	91.6	89.5	89.5	89.5	89.5	89.5	89.5	92.1	91.1	92.1	88.5	97.4	97.9	97.9	97.4	97.9	97.4	96.9	97.4	97.9	96.9	97.4	98.4	97.9	97.9	97.9	97.4	99.0	97.4	97.9	97.9	96.9	97.4	97.9	95.3	99.0	96.9	97.4	97.9	97.4	96.9	97.9	97.4	98.4
MT943520_China	89.5	89.5	89.0	88.5	87.4	89.5	88.5	88.5	88.5	88.5	88.5	88.5	91.1	90.1	90.1	87.4	96.3	97.9	97.9	97.4	97.9	97.4	96.9	97.4	97.9	96.9	98.4	97.4	97.9	97.9	97.9	97.4	96.9	97.4	97.9	97.9	97.9	97.4	97.9	95.3	96.9	96.9	97.4	97.9	97.4	95.8	97.9	96.3	98.4
MW752438-China	90.6	90.6	89.0	88.5	87.4	90.6	88.5	88.5	88.5	88.5	88.5	88.5	91.1	90.1	91.1	87.4	98.4	99.0	99.0	98.4	99.0	98.4	97.9	98.4	99.0	97.9	98.4	99.5	96.9	96.9	99.0	98.4	100.0	98.4	99.0	99.0	97.9	98.4	99.0	96.3	100.0	97.9	98.4	99.0	98.4	97.9	99.0	98.4	97.4
MK055337_United_States	90.6	89.5	89.0	89.5	88.5	91.6	89.5	89.5	89.5	89.5	89.5	89.5	91.1	90.1	91.1	87.4	97.4	97.9	97.9	97.4	97.9	97.4	96.9	97.4	97.9	96.9	97.4	98.4	97.9	97.9	97.9	97.4	97.9	97.4	97.9	97.9	96.9	97.4	97.9	95.3	97.9	97.9	97.4	97.9	97.4	95.8	97.9	96.3	98.4
LC472499_Indonesia	89.5	89.5	89.0	88.5	88.5	88.0	88.5	88.5	88.5	88.5	88.5	88.5	92.1	91.1	90.1	89.0	90.1	90.6	90.6	90.1	90.6	90.1	90.1	90.1	90.6	89.5	90.1	90.1	91.6	91.6	90.6	90.1	90.6	91.1	90.6	90.6	90.1	90.1	90.6	88.0	90.6	89.5	90.1	90.6	90.1	90.6	90.6	90.1	92.1
KY617826_Timor-Leste	88.0	88.0	87.4	88.0	88.0	88.5	88.0	88.0	88.0	88.0	88.0	88.0	90.6	89.5	89.0	86.4	87.4	89.0	89.0	88.5	89.0	88.5	88.0	89.5	89.0	88.0	88.5	88.5	90.1	90.1	89.0	89.5	89.0	89.5	89.0	89.0	88.0	89.0	89.0	87.4	89.0	88.5	89.0	89.0	89.0	89.5	89.0	88.5	90.6
MG780352_Papua_New_Guinea	90.1	90.1	90.1	90.1	89.0	91.1	90.1	90.1	90.1	90.1	90.1	90.1	91.1	90.1	92.1	88.5	85.9	87.4	87.4	86.9	87.4	86.9	86.4	86.9	87.4	86.4	86.9	86.9	88.5	88.5	87.4	86.9	87.4	86.9	87.4	87.4	86.4	87.4	87.4	86.9	87.4	86.9	87.4	87.4	87.4	88.0	87.4	85.9	88.0
JQ700305_Taiwan	85.9	85.9	85.9	86.9	85.9	88.0	86.9	86.9	86.9	86.9	86.9	86.9	90.6	89.5	88.0	86.9	86.9	87.4	87.4	86.9	87.4	86.9	86.4	88.0	87.4	86.4	88.0	86.9	87.4	87.4	87.4	88.0	86.4	88.0	87.4	87.4	87.4	86.9	87.4	85.9	86.4	87.4	86.9	87.4	86.9	86.4	87.4	85.9	88.0
JF939813_Spain	89.5	88.5	89.0	89.5	88.5	90.6	89.5	89.5	89.5	89.5	89.5	89.0	90.6	90.6	90.6	91.1	87.4	86.9	86.9	86.4	86.9	86.4	85.9	87.4	86.9	85.9	86.4	87.4	86.9	86.9	86.9	87.4	88.0	86.4	86.9	86.9	85.9	86.9	86.9	86.4	88.0	86.4	86.9	86.9	86.9	86.4	86.9	86.4	87.4
JQ700306_Taiwan	90.1	90.1	89.5	88.5	87.4	89.0	88.5	88.5	88.5	88.5	88.5	88.5	90.6	90.1	90.6	90.1	88.5	89.0	89.0	88.5	89.0	88.5	88.0	88.5	89.0	88.0	89.5	88.5	90.1	90.1	89.0	88.5	89.0	88.5	89.0	89.0	89.0	88.5	89.0	87.4	89.0	88.0	88.5	89.0	88.5	89.0	89.0	87.4	89.5
MN688219_India	89.0	89.0	88.5	89.5	88.5	90.6	89.5	89.5	89.5	89.5	89.5	89.5	91.1	90.1	89.5	89.5	87.4	88.0	88.0	87.4	88.0	87.4	86.9	88.5	88.0	86.9	87.4	87.4	88.0	88.0	88.0	88.5	88.0	88.5	88.0	88.0	86.9	87.4	88.0	87.4	88.0	87.4	87.4	88.0	87.4	86.9	88.0	87.4	89.5
MN688220_India	89.0	89.0	88.5	89.0	88.0	90.1	89.0	89.0	89.0	89.0	89.0	89.0	91.1	90.1	89.5	89.0	88.5	89.0	89.0	88.5	89.0	88.5	88.0	89.5	89.0	88.0	88.5	88.5	89.0	89.0	89.0	89.5	88.0	89.5	89.0	89.0	88.0	88.5	89.0	88.5	88.0	88.5	88.5	89.0	88.5	86.9	89.0	87.4	90.6
HQ439023_China	90.1	90.1	89.5	89.0	88.0	90.1	89.0	89.0	89.0	89.0	89.0	89.0	91.6	90.6	90.6	88.0	97.4	99.0	99.0	98.4	99.0	98.4	97.9	98.4	99.0	97.9	98.4	98.4	98.4	98.4	99.0	98.4	97.9	98.4	99.0	99.0	97.9	98.4	99.0	96.3	97.9	97.9	98.4	99.0	98.4	96.9	99.0	96.3	99.0
LC217993_Brazil	45.3	45.9	45.3	45.3	44.8	45.3	45.3	45.3	45.3	45.3	45.3	45.3	46.5	45.9	45.9	45.9	43.0	43.0	43.0	42.4	43.0	42.4	45.8	43.6	43.0	42.4	43.6	43.6	42.4	42.4	43.0	43.6	43.6	43.6	43.0	43.0	43.0	43.0	43.0	43.0	43.6	43.0	43.0	43.0	43.0	43.0	43.0	43.6	43.0
LC217994_Brazil	45.9	46.5	45.9	45.9	45.3	45.9	45.9	45.9	45.9	45.9	45.9	45.9	47.1	46.5	46.5	46.5	43.6	43.6	43.6	43.0	43.6	43.0	46.4	44.2	43.6	42.4	44.2	44.2	43.0	43.0	43.6	44.2	44.2	44.2	43.6	43.6	43.6	43.6	43.6	43.6	44.2	43.6	43.6	43.6	43.6	43.6	43.6	44.2	43.6
LC516688_Brazil	45.3	45.9	45.3	45.3	44.8	45.3	45.3	45.3	45.3	45.3	45.3	45.3	46.5	45.9	45.9	45.9	43.0	43.0	43.0	42.4	43.0	42.4	45.8	43.6	43.0	42.4	43.6	43.6	42.4	42.4	43.0	43.6	43.6	43.6	43.0	43.0	43.0	43.0	43.0	43.0	43.6	43.0	43.0	43.0	43.0	43.0	43.0	43.6	43.0
P5 (aa)
X76931_France	100.0
MT027103_France	96.8	100.0
MZ202344_France	97.4	95.9	100.0
OP909804 (CABYV-PF-558) Brazil	94.6	95.3	93.6	100.0
OP909805 (CABYV-PF-564) Brazil	94.4	95.1	93.4	97.2	100.0
OP909806 (CABYV-PF-799) Brazil	93.6	94.0	92.5	95.1	94.9	100.0
OP909807 (CABYV-PF-724-1) Brazil	95.1	95.7	94.0	98.1	98.1	95.5	100.0
OP909808 (CABYV-PF-724-2) Brazil	95.1	95.7	94.0	98.1	98.1	95.5	100.0	100.0
OP909809 (CABYV-PF-724-3) Brazil	95.1	95.7	94.0	98.1	98.1	95.5	100.0	100.0	100.0
OP909810 (CABYV-PF-726-1) Brazil	95.1	95.7	94.0	98.1	98.1	95.5	100.0	100.0	100.0	100.0
OP909811 (CABYV-PF-726-2) Brazil	95.1	95.7	94.0	98.1	98.1	95.5	100.0	100.0	100.0	100.0	100.0
OP909812 (CABYV-PF-729) Brazil	94.9	95.5	93.8	97.9	97.9	95.5	99.4	99.4	99.4	99.4	99.4	100.0
JF939814_Spain	95.9	95.5	94.6	95.3	95.1	94.0	95.7	95.7	95.7	95.7	95.7	95.5	100.0
JF939812_Spain	95.7	95.7	94.9	95.3	95.1	94.0	95.7	95.7	95.7	95.7	95.7	95.5	98.7	100.0
MW051363_Spain	95.3	95.7	94.4	95.3	95.1	93.6	95.7	95.7	95.7	95.7	95.7	95.5	97.9	98.3	100.0
MW051362_Spain	96.1	96.6	95.3	95.5	95.3	94.8	95.9	95.9	95.9	95.9	95.9	95.7	98.1	98.3	97.9	100.0
KR231963_South_Korea	89.5	88.9	88.7	89.5	88.7	88.0	89.3	89.3	89.3	89.3	89.3	89.1	89.7	90.1	90.6	89.9	100.0
KR231962_South_Korea	88.9	88.2	87.8	89.1	88.2	87.6	88.9	88.9	88.9	88.9	88.9	88.7	89.3	89.7	90.1	89.5	98.9	100.0
KR231961_South_Korea	88.9	88.4	88.0	89.3	88.4	87.8	89.1	89.1	89.1	89.1	89.1	88.9	89.5	89.9	90.4	89.7	99.1	98.5	100.0
KR231960_South_Korea	88.9	88.4	88.0	89.3	88.4	87.8	89.1	89.1	89.1	89.1	89.1	88.9	89.5	89.9	90.4	89.7	99.1	99.8	98.7	100.0
KR231959_South_Korea	88.9	88.4	88.0	89.3	88.4	87.8	89.1	89.1	89.1	89.1	89.1	88.9	89.5	89.9	90.4	89.7	99.1	98.5	100.0	98.7	100.0
KR231958_South_Korea	89.1	88.7	88.2	89.5	88.7	88.0	89.3	89.3	89.3	89.3	89.3	89.1	89.7	90.1	90.6	89.9	99.6	98.9	99.1	99.1	99.1	100.0
KR231957_South_Korea	88.7	88.2	87.8	89.3	88.2	87.6	88.9	88.9	88.9	88.9	88.9	88.7	89.3	89.7	90.1	89.5	99.1	98.5	98.7	98.7	98.7	99.1	100.0
KR231956_South_Korea	88.4	88.0	87.6	88.9	88.0	87.3	88.7	88.7	88.7	88.7	88.7	88.4	89.1	89.5	90.1	89.3	98.9	98.3	98.5	98.5	98.5	98.9	98.5	100.0
KR231955_South_Korea	89.1	88.7	88.2	89.5	88.7	88.0	89.3	89.3	89.3	89.3	89.3	89.1	89.9	90.1	90.6	89.9	99.4	98.7	98.9	98.9	98.9	99.4	98.9	98.7	100.0
KR231954_South_Korea	89.1	88.7	88.2	89.5	88.7	88.0	89.3	89.3	89.3	89.3	89.3	89.1	89.7	90.1	90.6	89.9	99.6	98.9	99.1	99.1	99.1	99.6	99.1	98.9	99.4	100.0
KR231953_South_Korea	89.3	88.9	88.4	89.7	88.9	88.2	89.5	89.5	89.5	89.5	89.5	89.3	89.9	90.4	90.8	90.1	99.6	98.9	99.1	99.1	99.1	99.6	99.1	98.9	99.4	99.6	100.0
KR231952_South_Korea	90.1	89.5	89.3	89.5	89.1	88.6	89.5	89.5	89.5	89.5	89.5	89.3	90.8	91.0	91.0	91.4	94.9	94.4	95.1	94.7	95.1	94.9	94.4	94.2	94.7	94.9	94.9	100.0
KR231951_South_Korea	90.6	89.9	89.7	89.9	89.5	89.1	89.9	89.9	89.9	89.9	89.9	89.7	91.0	91.2	91.2	91.4	95.5	95.1	95.3	95.3	95.3	95.5	95.1	94.9	95.3	95.5	95.5	98.9	100.0
KR231950_South_Korea	90.6	89.9	89.7	89.9	89.5	88.8	89.9	89.9	89.9	89.9	89.9	89.7	91.0	91.2	91.2	91.4	95.5	95.1	95.3	95.3	95.3	95.5	95.1	94.9	95.3	95.5	95.5	98.9	100.0	100.0
KR231949_South_Korea	90.4	89.7	89.9	89.7	89.3	88.8	89.7	89.7	89.7	89.7	89.7	89.5	90.8	91.0	91.0	91.2	95.3	94.9	95.1	95.1	95.1	95.3	94.9	94.7	95.1	95.3	95.3	98.9	99.4	99.4	100.0
KR231948_South_Korea	89.1	88.7	88.2	89.5	88.7	88.0	89.3	89.3	89.3	89.3	89.3	89.1	89.7	90.1	90.6	89.9	99.6	98.9	99.1	99.1	99.1	99.6	99.1	98.9	99.4	99.6	99.6	94.9	95.5	95.5	95.3	100.0
KR231947_South_Korea	90.6	89.9	89.7	90.4	89.9	89.1	90.4	90.4	90.4	90.4	90.4	90.1	91.4	91.6	91.6	91.6	94.9	94.4	94.7	94.7	94.7	94.9	94.4	94.2	94.7	94.9	95.3	97.9	97.9	97.9	97.9	94.9	100.0
KR231946_South_Korea	89.1	88.6	88.2	89.1	88.6	87.7	89.3	89.3	89.3	89.3	89.3	89.1	89.7	90.1	90.6	89.9	99.6	98.9	99.1	99.1	99.1	99.6	99.1	98.9	99.4	99.6	99.6	94.9	95.5	95.5	95.3	99.6	94.9	100.0
KR231945_South_Korea	89.1	88.7	88.2	89.5	88.7	88.0	89.3	89.3	89.3	89.3	89.3	89.1	89.7	90.1	90.6	89.9	99.6	98.9	99.1	99.1	99.1	99.6	99.1	98.9	99.4	99.6	99.6	94.9	95.5	95.5	95.3	99.6	94.9	99.6	100.0
KR231944_South_Korea	89.1	88.7	88.2	89.5	88.7	88.0	89.3	89.3	89.3	89.3	89.3	89.1	89.7	90.1	90.6	89.9	99.6	98.9	99.1	99.1	99.1	99.6	99.1	98.9	99.4	99.6	99.6	94.9	95.5	95.5	95.3	99.6	94.9	99.6	99.6	100.0
KR231943_South_Korea	88.9	88.4	88.0	89.3	88.4	87.8	89.1	89.1	89.1	89.1	89.1	88.9	89.5	89.9	90.4	89.7	99.4	98.7	98.9	98.9	98.9	99.4	98.9	98.7	99.1	99.4	99.4	94.7	95.3	95.3	95.1	99.4	94.7	99.4	99.4	99.4	100.0
KR231942_South_Korea	89.1	88.7	88.2	89.1	88.7	87.6	89.3	89.3	89.3	89.3	89.3	89.1	89.3	89.7	90.1	89.5	98.9	98.3	99.4	98.5	99.4	98.9	98.5	98.3	98.7	98.9	98.9	94.7	94.9	94.9	94.7	98.9	94.2	98.9	98.9	98.9	98.7	100.0
MZ508305_South_Korea	88.7	88.2	87.8	89.1	88.2	87.6	88.9	88.9	88.9	88.9	88.9	88.7	89.3	89.7	90.1	89.5	99.1	98.9	98.7	99.1	98.7	99.1	98.7	98.5	98.9	99.1	99.1	94.4	95.1	95.1	94.9	99.1	94.4	99.1	99.1	99.1	98.9	98.5	100.0
LC082306_South_Korea	90.1	89.5	89.3	89.9	89.5	88.6	89.9	89.9	89.9	89.9	89.9	89.7	90.8	91.0	91.4	91.0	95.3	94.9	95.1	95.1	95.1	95.3	94.9	94.7	95.1	95.3	95.3	98.5	98.9	98.9	99.1	95.3	97.9	95.3	95.3	95.3	95.1	94.7	94.9	100.0
MW509732_South_Korea	90.4	89.7	89.5	89.9	89.5	88.6	89.9	89.9	89.9	89.9	89.9	89.7	90.8	91.0	91.0	91.0	94.9	94.0	94.2	94.2	94.2	94.4	94.0	93.8	94.2	94.4	94.9	97.2	97.6	97.6	97.9	94.4	98.3	94.4	94.4	94.4	94.2	93.8	94.0	97.9	100.0
MG257903_South_Korea	89.1	88.7	88.2	89.1	88.7	87.6	89.3	89.3	89.3	89.3	89.3	89.1	89.3	89.7	90.1	89.5	98.9	98.3	99.4	98.5	99.4	98.9	98.5	98.3	98.7	98.9	98.9	94.7	94.9	94.9	94.7	98.9	94.2	98.9	98.9	98.9	98.7	100.0	98.5	94.7	93.8	100.0
MG257902_South_Korea	88.9	88.4	88.0	89.3	88.4	87.8	89.1	89.1	89.1	89.1	89.1	88.9	89.5	89.9	90.4	89.7	99.1	98.5	99.6	98.7	99.6	99.1	98.7	98.5	98.9	99.1	99.1	94.9	95.1	95.1	94.9	99.1	94.4	99.1	99.1	99.1	98.9	99.8	98.7	94.9	94.0	99.8	100.0
MG257901_South_Korea	89.3	88.9	88.4	89.3	88.9	87.8	89.5	89.5	89.5	89.5	89.5	89.3	89.5	89.9	90.4	89.7	99.1	98.5	99.6	98.7	99.6	99.1	98.7	98.5	98.9	99.1	99.1	94.9	95.1	95.1	94.9	99.1	94.4	99.1	99.1	99.1	98.9	99.8	98.7	94.9	94.0	99.8	99.6	100.0
MG257900_South_Korea	88.9	88.4	88.0	89.3	88.4	87.8	89.1	89.1	89.1	89.1	89.1	88.9	89.5	89.9	90.4	89.7	99.1	98.5	99.6	98.7	99.6	99.1	98.7	98.5	98.9	99.1	99.1	94.9	95.1	95.1	94.9	99.1	94.4	99.1	99.1	99.1	98.9	99.8	98.7	94.9	94.0	99.8	100.0	99.6	100.0
MG257899_South_Korea	88.9	88.4	88.0	89.3	88.4	87.8	89.1	89.1	89.1	89.1	89.1	88.9	89.5	89.9	90.4	89.7	99.4	98.7	99.4	98.9	99.4	99.4	98.9	98.7	99.1	99.4	99.4	94.7	95.3	95.3	95.1	99.4	94.7	99.4	99.4	99.4	99.1	99.6	98.9	95.1	94.2	99.6	99.8	99.4	99.8	100.0
GQ221224_Japan	89.3	88.9	88.4	89.7	88.9	88.2	89.5	89.5	89.5	89.5	89.5	89.3	89.9	90.4	90.8	90.1	99.8	99.1	99.4	99.4	99.4	99.8	99.4	99.1	99.6	99.8	99.8	95.1	95.7	95.7	95.5	99.8	95.1	99.8	99.8	99.8	99.6	99.1	99.4	95.5	94.7	99.1	99.4	99.4	99.4	99.6	100.0
GQ221223_China	90.4	89.7	89.5	89.7	89.3	88.8	89.7	89.7	89.7	89.7	89.7	89.5	90.8	91.0	91.0	91.4	94.7	94.2	94.9	94.4	94.9	94.7	94.2	94.0	94.4	94.7	94.7	98.5	98.5	98.5	98.7	94.7	97.0	94.6	94.7	94.7	94.4	94.4	94.2	98.3	97.4	94.4	94.7	94.7	94.7	94.4	94.9	100.0
EU000535_China	90.8	90.1	89.9	89.7	89.3	88.8	89.9	89.9	89.9	89.9	89.9	89.7	90.8	91.0	91.0	91.2	95.1	94.7	94.9	94.9	94.9	95.1	94.7	94.4	94.9	95.1	95.5	96.8	97.0	97.0	97.0	95.1	97.2	95.1	95.1	95.1	94.9	94.4	94.7	97.0	96.6	94.4	94.7	94.7	94.7	94.9	95.3	96.2	100.0
EU636992_China	90.6	89.9	89.7	90.1	89.7	89.1	90.1	90.1	90.1	90.1	90.1	89.9	91.2	91.6	91.6	91.4	95.9	95.5	95.7	95.7	95.7	95.9	95.5	95.3	95.7	95.9	95.9	98.7	99.1	99.1	99.4	95.9	97.9	95.9	95.9	95.9	95.7	95.3	95.5	99.1	97.9	95.3	95.5	95.5	95.5	95.7	96.2	98.5	97.2
MT943520_China	90.6	89.9	89.7	89.9	89.5	89.1	90.1	90.1	90.1	90.1	90.1	89.9	90.6	90.8	90.8	91.0	94.4	94.0	94.2	94.2	94.2	94.4	94.0	93.8	94.2	94.4	94.9	97.0	97.2	97.2	97.2	94.4	97.2	94.4	94.4	94.4	94.2	93.8	94.0	97.2	96.8	93.8	94.0	94.0	94.0	94.2	94.7	96.8	98.3
MW752438-China	91.2	90.8	90.4	90.4	89.9	89.5	90.4	90.4	90.4	90.4	90.4	90.1	91.4	91.6	91.6	91.9	95.3	94.7	94.9	94.9	94.9	95.1	94.7	94.4	94.9	95.1	95.5	97.9	98.3	98.3	98.3	95.1	98.9	95.1	95.1	95.1	94.9	94.4	94.7	97.9	98.5	94.4	94.7	94.7	94.7	94.9	95.3	97.4	97.4
MK055337_United_States	90.6	89.9	89.7	89.7	89.3	88.4	89.7	89.7	89.7	89.7	89.7	89.5	90.8	91.0	91.0	91.2	94.9	94.2	94.9	94.4	94.9	94.6	94.2	94.0	94.4	94.6	95.1	97.0	97.4	97.4	97.6	94.6	97.2	94.6	94.6	94.6	94.4	94.4	94.2	97.4	97.0	94.4	94.6	94.6	94.6	94.9	94.9	96.8	97.4
LC472499_Indonesia	88.4	88.2	87.3	88.4	87.6	87.1	88.2	88.2	88.2	88.2	88.2	88.0	89.5	89.5	89.9	89.3	90.1	89.9	90.1	90.1	90.1	90.1	89.7	89.5	90.1	90.1	90.6	91.0	91.4	91.4	91.0	90.1	91.6	90.1	90.1	90.1	90.4	89.7	89.7	91.2	91.2	89.7	89.9	89.9	89.9	89.9	90.4	91.0	90.4
KY617826_Timor-Leste	89.5	88.9	88.4	89.7	88.9	88.4	89.5	89.5	89.5	89.5	89.5	89.3	90.6	90.6	91.0	90.4	90.4	90.2	90.2	90.4	90.2	90.4	90.0	89.7	90.4	90.4	90.8	91.7	91.7	91.6	91.5	90.4	92.3	90.4	90.4	90.4	90.6	90.0	90.0	91.7	91.7	90.0	90.2	90.2	90.2	90.2	90.6	91.5	91.0
MG780352_Papua_New_Guinea	85.7	85.2	85.0	86.3	85.4	85.0	86.1	86.1	86.1	86.1	86.1	85.9	86.9	87.2	87.6	86.9	88.2	88.2	88.2	88.5	88.2	88.2	88.0	88.0	88.0	88.2	88.5	89.5	89.5	89.7	89.3	88.2	89.3	88.4	88.2	88.2	88.0	87.8	87.8	89.5	88.7	87.8	88.0	88.0	88.0	88.0	88.5	89.3	88.5
JQ700305_Taiwan	85.4	86.0	84.5	85.4	85.2	84.3	86.0	86.0	86.0	86.0	86.0	85.8	86.2	86.5	86.9	86.2	88.4	88.0	88.2	88.2	88.2	88.4	88.0	87.7	88.6	88.4	88.6	88.6	89.2	89.2	88.8	88.4	88.8	88.4	88.4	88.6	88.2	88.2	88.0	89.2	88.6	88.2	88.0	88.4	88.0	88.2	88.6	88.8	88.8
JF939813_Spain	95.3	95.1	94.9	94.2	94.0	93.6	94.7	94.7	94.7	94.7	94.7	94.4	98.1	98.1	97.2	97.9	89.3	88.9	89.1	89.1	89.1	89.3	88.9	88.7	89.3	89.3	89.5	90.4	90.6	90.6	90.4	89.3	91.0	89.3	89.3	89.3	89.1	88.9	88.9	90.4	90.4	88.9	89.1	89.1	89.1	89.1	89.5	90.4	90.1
JQ700306_Taiwan	86.3	86.1	85.4	86.5	85.6	86.0	86.3	86.3	86.3	86.3	86.3	86.1	87.1	87.6	87.3	87.3	89.5	89.3	89.7	89.5	89.7	89.5	89.1	88.8	89.3	89.5	89.7	91.4	91.2	91.2	91.4	89.5	90.3	89.5	89.5	89.5	89.3	89.3	89.1	91.4	90.1	89.3	89.5	89.5	89.5	89.3	89.7	91.6	90.6
MN688219_India	89.5	89.1	88.9	88.9	88.2	88.2	88.9	88.9	88.9	88.9	88.9	88.7	89.7	89.9	89.9	89.7	89.5	88.7	89.3	88.9	89.3	89.1	88.7	88.5	89.1	89.1	89.3	90.8	91.5	91.4	91.0	89.1	90.2	89.1	89.1	89.3	88.9	88.9	88.7	91.0	90.6	88.9	89.1	89.1	89.1	89.1	89.3	91.5	90.0
MN688220_India	85.2	85.0	84.4	85.0	84.4	84.5	85.0	85.0	85.0	85.0	85.0	84.8	85.7	85.7	85.7	85.7	85.5	85.3	85.7	85.3	85.7	85.5	85.0	84.8	85.5	85.5	85.7	86.5	87.2	87.2	86.8	85.5	85.9	85.4	85.5	85.7	85.3	85.3	85.0	86.8	85.9	85.3	85.5	85.5	85.5	85.5	85.7	87.4	85.9
HQ439023_China	90.4	89.7	89.5	89.7	89.3	88.8	89.7	89.7	89.7	89.7	89.7	89.5	90.8	91.0	91.0	91.2	94.9	94.4	94.7	94.7	94.7	94.9	94.4	94.2	94.7	94.9	94.9	98.7	98.9	98.9	98.9	94.9	98.1	94.9	94.9	94.9	94.7	94.2	94.4	98.5	97.9	94.2	94.4	94.4	94.4	94.7	95.1	98.3	96.8
LC217993_Brazil	26.4	28.9	27.1	27.8	26.8	27.3	26.6	26.6	26.6	26.6	26.6	27.1	26.3	26.1	26.8	27.4	28.9	28.9	27.9	28.9	27.9	28.9	28.6	28.6	28.8	29.1	29.1	26.7	26.9	26.9	26.9	28.9	27.6	28.6	28.9	28.9	28.4	27.6	28.9	26.4	27.6	27.6	27.9	27.6	27.9	27.9	28.9	26.9	28.6
LC217994_Brazil	26.2	28.7	26.5	27.6	26.9	27.1	26.4	26.4	26.4	26.4	26.4	26.9	28.0	28.0	28.4	29.0	28.4	28.1	28.6	28.1	28.6	28.4	29.3	27.6	28.4	28.6	28.6	27.1	27.4	27.4	27.4	28.4	28.0	28.1	28.4	28.4	27.9	28.4	28.4	26.9	28.0	28.4	28.6	28.4	28.6	28.6	28.4	27.1	27.4
LC516688_Brazil	26.2	28.8	26.9	27.6	26.7	27.1	26.4	26.4	26.4	26.4	26.4	26.9	26.2	25.9	26.6	27.2	28.7	28.7	27.7	28.7	27.7	28.7	28.4	28.5	28.6	28.9	28.9	26.5	26.8	26.8	26.7	28.7	27.4	28.5	28.7	28.7	28.2	27.5	28.7	26.3	27.4	27.5	27.7	27.5	27.7	27.7	28.7	26.7	28.5
[truncated: 16 more columns]
